# Supplementary material for: Expanding Network Analysis Tools in Psychological Networks: Minimal Spanning Trees, Participation Coefficients, and Motif Analysis Applied to a Network of 26 Psychological Attributes
Source: Hindawi journal article supplement (doi:10.1155/2019/9424605), 2019-01-01
Supplement: f1 [file 9424605.f1.docx]

**Supplementary Materials for**

**Expanding network analysis tools in psychological networks:**

**Minimal spanning trees, participation coefficients, and motif analysis applied to a network of 26 psychological attributes**

**This PDF file includes:**

More details about procedures and results of the analyses are organized in 13 sections:

Data processing,

Sample description,

Descriptive of missing data,

Descriptive statistics of 26 psychological attributes,

The choice of the estimation method

Robustness analyses,

Network of 26 psychological attributes,

Analysis of network ties

Centrality analysis

Correlations between four centrality measures in full network and in MST

MST with different distance measure

The effect of reverse coding on the analyses

Participation Coefficient based on empirical (data-driven) communities

**1. Data processing**

Data file of each questionnaire was processed in several steps: if only items scores were available (true for most of the measures), all cases with more than 15% missing data within a questionnaire were excluded. After recoding, the missing data was replaced with median of individual scores on all items of questionnaire, or a subset of questionnaire to which item belong to, before final score(s) were calculated. This strategy seemed more sensible than taking an average score of non-missing values, since some scores had to be calculated using slightly more elaborate procedure than taking a sum or average of scores (e.g. Schwartz’s values). We used the mean instead of average value, to preserve the same level of precision (that is, not to induce scores with more decimals artificially). Then, we merged all the files based on the unique ID (a string of letters and numbers) in one dataset. Lastly, we excluded all cases that had data (a score) just for one of 26 variables, ending with in total 1166923 cases which had data about at least two psychological attributes.

**2. Sample description**

A separate data file contained demographic information for some participants, extracted from Facebook profile, if the data was available on the profile and if the participants gave their consent to use it. Data about age was available for 20,8% after reevaluation of some cases as missing data due to a high chance of being inaccurate (all older than 89 yrs, *n*= 568, Table 2).

TABLE 1: *Countries with more than 1000 participants in the sample (in descending order)*

| *Country* | *N* |
| --- | --- |
| USA | 273138 |
| UK | 72747 |
| Canada | 36188 |
| Australia | 25499 |
| India | 9233 |
| Singapore | 6800 |
| Philippines | 6146 |
| Ireland | 4904 |
| Spain | 4872 |
| Mexico | 4410 |
| France | 3867 |
| Malaysia | 3751 |
| Indonesia | 3483 |
| Sweden | 2763 |
| Pakistan | 2543 |
| Italy | 2220 |
| Germany | 2121 |
| Finland | 1697 |
| Netherlands | 1565 |
| Egypt | 1495 |
| Belgium | 1354 |
| Greece | 1350 |
| Colombia | 1317 |
| Romania | 1217 |
| Argentina | 1199 |
| Japan | 1087 |
| Portugal | 1086 |
| Brazil | 1061 |
| Denmark | 1043 |

TABLE 2: *Descriptive statistics for age (for available data, N=242726)*

| *Mean* | *SD* | *Mdn* | *Min.* | *Max.* | *Skew.* | *Kurt.* | *N* | *% of total sample* |
| --- | --- | --- | --- | --- | --- | --- | --- | --- |
| 26,13 | 6,663 | 25 | 14 | 89 | 2,465 | 10,459 | 242726 | 20,8 |

**3. Descriptive of missing data**

TABLE 3: *Number of not-available data (NA) on 26 psychological attributes per case*

|  | *Mean* | *SD* | *Mdn* | *Min.* | *Max.* | *Skew.* | *Kurt.* | *N* |  |
| --- | --- | --- | --- | --- | --- | --- | --- | --- | --- |
| Number of NA per case | 20,76 | 1,462 | 21 | 0 | 24 | -5,61 | 47,463 | 1166923 |  |

TABLE 4: *Matrix of sample sizes of complete observations (non-NA) pairwise*

| Quest. | 1 | 2 | 3 | 4 | 5 | 6 | 7 | 8 | 9 | 10 | 11 |
| --- | --- | --- | --- | --- | --- | --- | --- | --- | --- | --- | --- |
| 1.Body Consc. (*BCQ)* | | 4319 | 1480 | 6187 | 5158 | 9451 | 7903 | 2178 | 6758 | 2280 | 4771 |
| 2.Big5 traits (*IPIP*) | | | 1743 | 5393 | 10583 | 46250 | 10634 | 3021 | 32412 | 2328 | 3981 |
| 3.Intelligence (*myIq*) | | |  | 1423 | 1428 | 2556 | 1945 | 1177 | 1798 | 1066 | 1879 |
| 4. Awareness of physical symptoms (*Pill*) | | | |  | 6550 | 11458 | 9726 | 2028 | 8689 | 2159 | 4154 |
| 5.Integrity assessment (*Orpheus)* | | | | | | 17798 | 12120 | 2253 | 12967 | 1978 | 4107 |
| 6.Interests (*SIQ*) | | |  |  |  |  | 22765 | 4131 | 61560 | 3615 | 7647 |
| 7.Self-monitoring (*SMS*) | | | |  |  |  |  | 2990 | 15726 | 2828 | 6120 |
| 8.Values (*SVS*) | | |  |  |  |  |  |  | 2770 | 2447 | 2721 |
| 9.Life Satisfaction (*SWLS*) | | | | |  |  |  |  |  | 2549 | 5143 |
| 10.Depression (*CES-D*) | | | |  |  |  |  |  |  |  | 2621 |
| 11.Empathy (*EQ*) | | |  |  |  |  |  |  |  |  |  |

Quest. – Questionnaire;

Acronyms in the brackets – usually used abbreviations for psychological instruments described in Table 1. in the main text;

Body Consc. – Body Consciousness.

The minimum sample size complete pairwise observation for 11 questionnaires was 1006 (Intelligence and Depression), and maximum size was 61560. However, the true maximum size for complete pairwise observations of 26 traits (measured by those 11 questionnaires) was 1048574 for all pairs of Big 5 personality traits (equal to the number of participants who had fulfilled IPIP questionnaire, see Table 5 below). When all 325 pairs of observations are considered, the median sample size was 4131 (Mean = 43776,99, SD=180530,616).

**4. Descriptive statistics of 26 psychological attributes**

TABLE 5: *Descriptive statistics of psychological attributes*

| *PA* | *N* | *% of non*  *NA* | *Mean* | *SD* | *Mdn* | *Min.* | *Max.* | *Skew.* | *Kurt.* |
| --- | --- | --- | --- | --- | --- | --- | --- | --- | --- |
| Agreeableness | 1048574 | 89,86 | 3,55 | 0,692 | 3,60 | 1 | 5 | -0,441 | 0,065 |
| Conscientiousness | 1048574 | 89,86 | 3,49 | 0,723 | 3,50 | 1 | 5 | -0,169 | -0,307 |
| Emotional stability | 1048574 | 89,86 | 2,77 | 0,802 | 2,75 | 1 | 5 | 0,165 | -0,37 |
| Extraversion | 1048574 | 89,86 | 3,61 | 0,796 | 3,75 | 1 | 5 | -0,442 | -0,244 |
| Openness | 1048574 | 89,86 | 3,83 | 0,670 | 3,90 | 1 | 5 | -0,516 | 0,083 |
| Body competence | 13735 | 1,18 | 4,44 | 0,809 | 4,50 | 1 | 6 | -0,396 | 0,081 |
| Private body | 13735 | 1,18 | 4,32 | 0,833 | 4,40 | 1 | 6 | -0,343 | -0,038 |
| Public body | 13735 | 1,18 | 4,29 | 0,752 | 4,33 | 1 | 6 | -0,31 | 0,195 |
| Fair-Mindedness | 33791 | 2,90 | 1,49 | 6,189 | 1,50 | -19 | 20,5 | -0,038 | -0,418 |
| Self-Disclosure | 33791 | 2,90 | 0,23 | 6,713 | 0 | -19,5 | 19,5 | 0,021 | -0,645 |
| Intellectual int. | 144924 | 12,42 | 27,86 | 3,715 | 28 | 7 | 35 | -0,663 | 0,824 |
| Low militaristic  Int. | 144924 | 12,42 | 30,47 | 7,367 | 31 | 10 | 50 | -0,073 | -0,334 |
| Low violent-occult int. | 144924 | 12,42 | 20,27 | 5,508 | 20 | 7 | 35 | -0,048 | -0,416 |
| Wholesome act. int. | 144924 | 12,42 | 17,15 | 3,896 | 17 | 5 | 25 | -0,414 | -0,138 |
| Awareness of physical symp. | 14675 | 1,26 | 65,23 | 29,675 | 61 | 0 | 181 | 0,685 | 0,195 |
| Empathy | 9985 | 0,86 | 44,07 | 12,873 | 44,50 | 1 | 79 | -0,183 | -0,301 |
| Intelligence | 3829 | 0,33 | 113,77 | 14,399 | 116,3 | 64,7 | 138,6 | -0,458 | -0,275 |
| Life satisfaction | 76267 | 6,54 | 4,37 | 1,362 | 4,40 | 1 | 7 | -0,3 | -0,781 |
| Low Depression | 4973 | 0,43 | 45,52 | 12,692 | 45 | 20 | 80 | 0,176 | -0,736 |
| Self-monitoring | 29635 | 2,54 | 148,44 | 16,462 | 150 | 100 | 200 | -0,035 | -0,364 |
| Achievement | 7930 | 0,68 | 0,17 | 1,041 | 0,21 | -3,9 | 5,1 | -0,177 | 0,365 |
| Hedonism | 7930 | 0,68 | -0,12 | 1,465 | -0,04 | -5,8 | 5,1 | -0,309 | 0,252 |
| Power | 7930 | 0,68 | -2,15 | 1,478 | -2,25 | -6,6 | 3,6 | 0,361 | 0,075 |
| Self-direction | 7930 | 0,68 | 0,99 | 0,918 | 0,99 | -2,7 | 5,9 | -0,027 | 0,2 |
| Tradition | 7930 | 0,68 | -1,36 | 1,182 | -1,33 | -6,1 | 2,8 | -0,096 | -0,207 |
| Universalism | 7930 | 0,68 | 0,37 | 0,942 | 0,40 | -3,7 | 3,7 | -0,247 | 0,375 |

M - Mean, Mdn - Median. SD – Standard deviation, Min. – minimum score, Max. – maximum score, Skew. - skewness, Kurt.- kurtosis, PA – psychological attribute

**
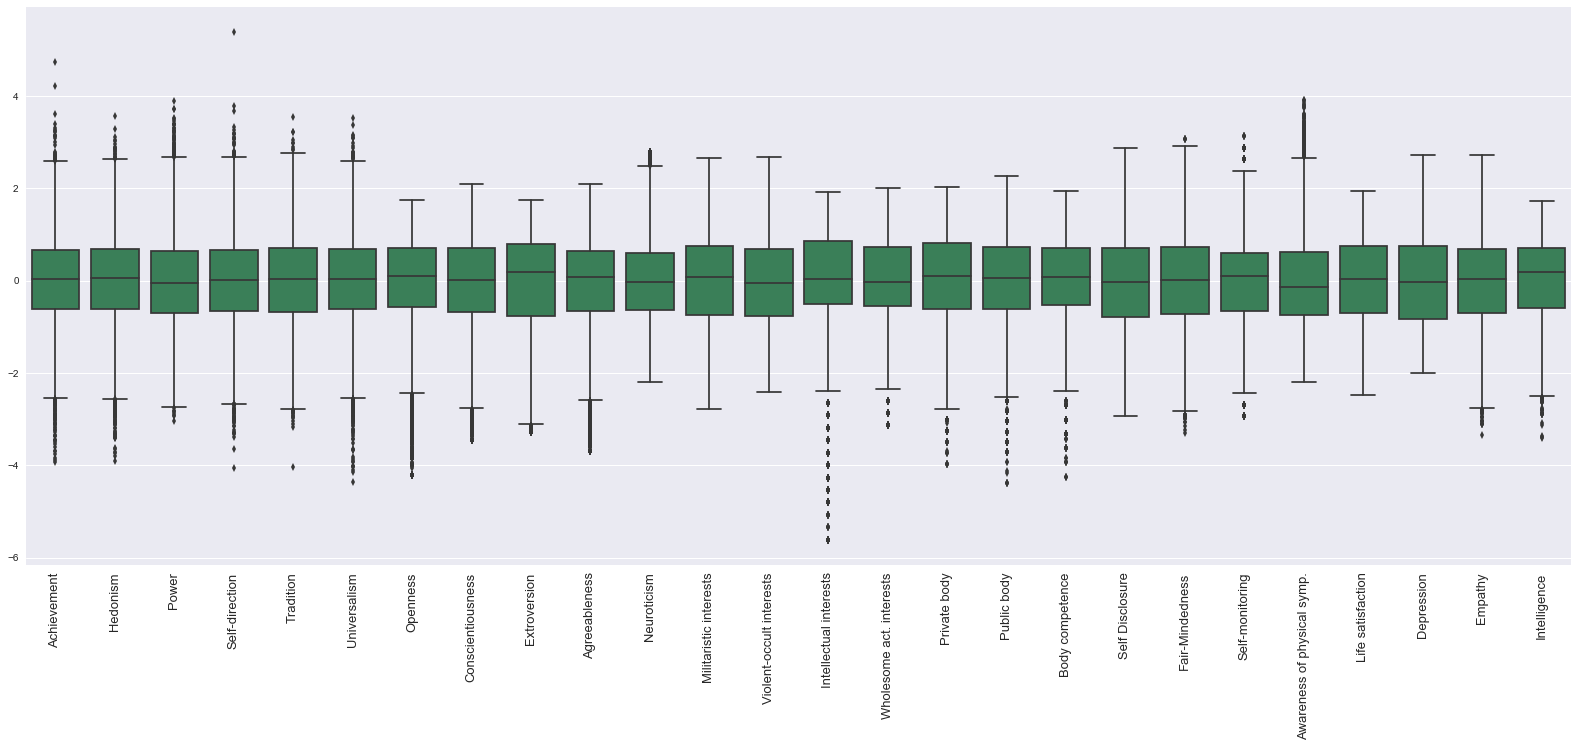
**

FIGURE 1: Boxplots of 26 standardized psychological attributes

**5. The choice of the estimation method**

In previous research that dealt with estimation of psychological networks with ordinal and continuous variables, the most popular procedure was partial correlation networks regularized with graphical LASSO technique (gLASSO) [1], applied from the fields such as neuroscience and genomics. Williams et al. [2, 3] have recently pointed out that this procedure is not always optimal for high dimensional data in psychological research setting where number of variables does not exceeds the number of observations. In the paper, authors also introduce a non-regularized method based on maximum likelihood estimations (used in our study), and demonstrate that it outperforms gLASSO technique regarding false positives and has overall more consistent performance. Epskamp and Fried [1] reported lower specificity of gLASSO than expected for dense network structures with many very small edges as well.

Given the correlation network of our dataset and previous research on correlations between the concepts included in the network we expected that our network will have many very small edges. To that end, we had to consider those recent findings suggesting that gLASSO method may not be appropriate.

To find out which estimation method is the best for our data, we preformed simulations (following procedure described in [2, 3] to compare the performance of the most popular models: (i) gLASSO, with tuning parameter () set to 0.5, and (ii) gLASSO, with tuning parameter () set to to 0 – the latter variation is added as it preserves more edges and as such provides a good comparison with the non-regularized method); with (iii) non-regularized method based on maximum likelihood estimation for covariance and precision matrix.

R package qgraph is used to fit the gLASSO models [4] and the non-regularized model was estimated with custom function provided in Williams and Rast [3]. The graphical lasso estimates the precision matrix with l1-based regularization, while non-regularized method estimates the precision matrix in two steps. Firstly, it is estimated with non-regularized maximum likelihood and then it uses Fisher Z-transformed confidence intervals (alpha set to 0.001) to determine non-zero relationships.

Next, the positive definite partial correlation matrix estimated with the non-regularized method (described above) was performed on our data. Afterwards that estimation was used to generate samples of different sizes from the corresponding standard multinormal distribution (M= 0, SD= 1; GeneNet R package [5]. We simulated samples of size N ∈ {500, 1000, 1500, 2000, 2500, 3000, 3500, 4000, 4500, and 5000} to have N used in our estimation procedure included in the range (N = 4131). Each sample size was simulated 50 times. From those 500 samples, networks were estimated with three methods (described above). After the partial correlation matrix was obtained for all samples and with all three methods, absolute values less than 0.05 were set to zero.

Next, four performance measures were computed for each estimation to check the accuracy of the estimated partial correlations: a) sensitivity (SE) - the true positive rate; b) specificity (SP) – the true negative rate (1 − SP = the false positive rate), c) false positive rate, and d) Mathews correlation coefficient (MCC) – which calculates correlation between the true partial correlations and the estimated partial correlations, and ranges between -1 and 1. These measures were averaged across simulation trials grouped by sample size and the estimation method. The results of simulations are presented in Figure 2.


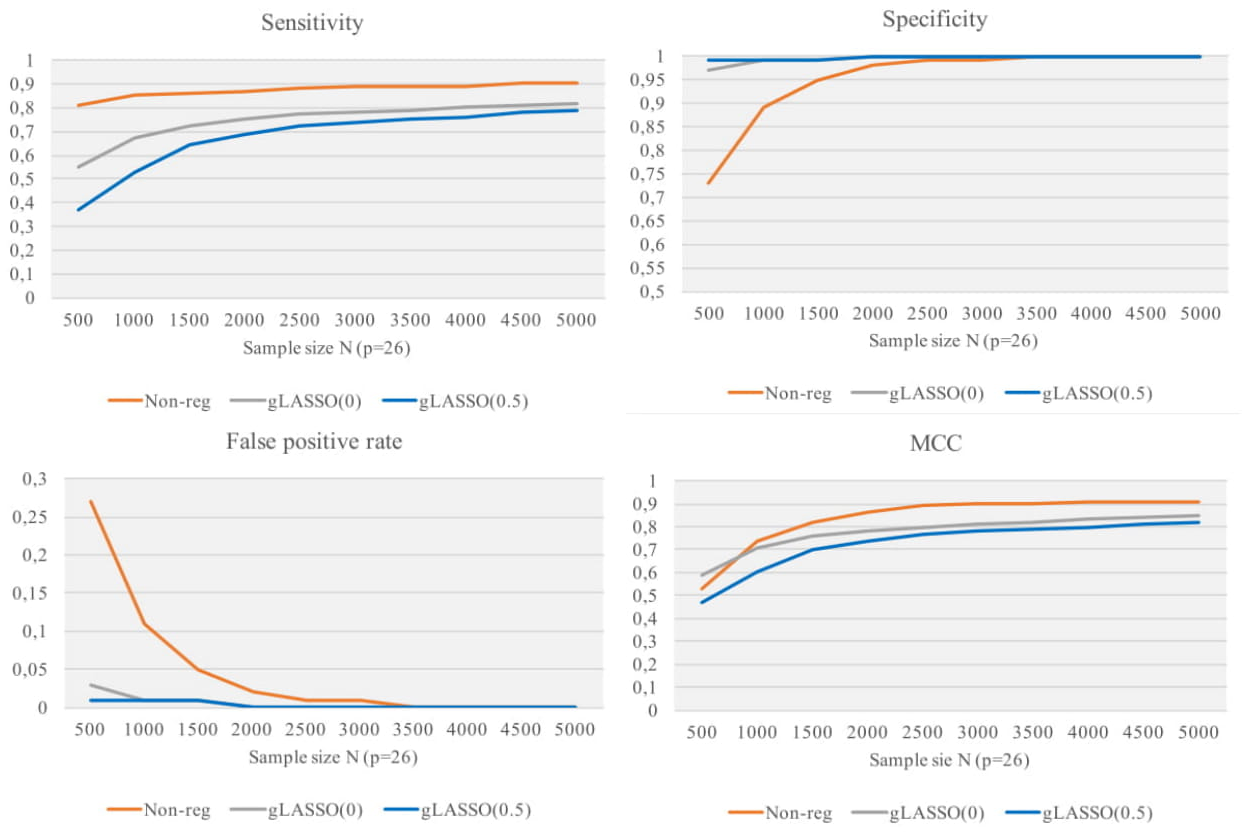


FIGURE 2: Simulation results comparing three estimation methods on four performance measures based on the average value of 50 simulations for each sample size (N).

In general, with the increase of N, all methods show an increasingly better performance. For the sample size below 2500 the performance of the three methods differ, and non-regularized method is inferior to gLASSO methods in regard to specificity (and its reversed measure, false positive rate). For sample sizes over 3500, the non-regularized method shows equal performance as other methods in specificity (and false positive rate), but it outperforms two gLASSO methods when sensitivity and MCC are considered. These results informed us to choose non-regularized method to estimate our network.

**Additional note on setting the N and alpha parameters:** The N – sample size parameter used in every network estimation method, is set to median value of complete pairwise observations in the whole 26 X 26 matrix. This seemed to be the most sensitive choice since we had many missing values, and the treatment of missing values in network analysis is still an open question. For that reason, we had to make the decision which N to use for network estimation procedure. We decided that making N equal to number of all participants (more than one million) would be overly permissive, while N equal to smallest pairwise sample (1006) would be overly restrictive. Opting for the balance between two extremes the median value was chosen (N = 4 131). Alpha set to 0,001 presents a rather strict choice, in purpose of preventing false positive edges. As a side-effect of these two decisions the smallest absolute value of edge weight that could be detected in our dataset as significant was 0.05, which presents a reasonable cut-off score for interpreting a partial correlation coefficient as signifying the existence of a (very weak) connection between concepts.

**6. Robustness analyses**

Existing procedures for estimating the stability of estimated psychological networks [3] where not directly applicable on our data due to high percentage of missing data for each variable. In order to test the stability of estimated network, two kinds of robustness tests have been performed: 1) comparisons of the estimated network in 100 split-halves samples, and 2) comparison of estimated network on whole sample with 100 samples consisting of randomly selected 80% of all cases, as explained in the main text.

The networks in both analyses were compared by calculating Spearman correlations between samples for nine centrality measures, and Pearson between network matrices as vectors. It should be noted that for Expected influence measures the rank correlations between absolute values are considered (as we were interested in the stability of the influence of node, not the direction of that influence).

We also looked at correlation between matrices of minimum spanning trees. Additionally, “Similarity Index” is calculated between each network pair and MST pair. This index takes only absence and presence of edges into account, it is defined as: the number of the edges present in both networks divided by all edges present in any of two networks. This measure has range of values from 0 to 1, where higher value indicates higher similarity.

When looking at the correlation and Similarity Indexes, it should be noted that minimum spanning tree contains only 0 and 1 weights and always has the same number of edges (number of nodes minus one).

**6.1. Robustness analysis I: Split halves (100 random splits, size of each split-half sample was N583461)**

For the calculation of partial coefficients, the size of the sample is set on 2075 – the median value of complete pairwise observations in one randomly chosen split-half sample. As in the estimation of the whole network, the alpha is set to 0.001.

**
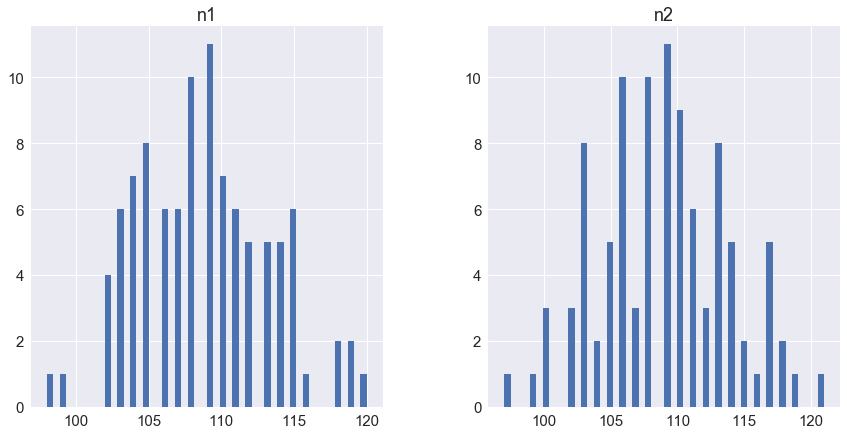
**

FIGURE 3: Number of ties in estimated network: first split-half (right): *M*=108,79; *SD*=4,55; second split-half (right): *M*=108, 92; *SD*=4,84


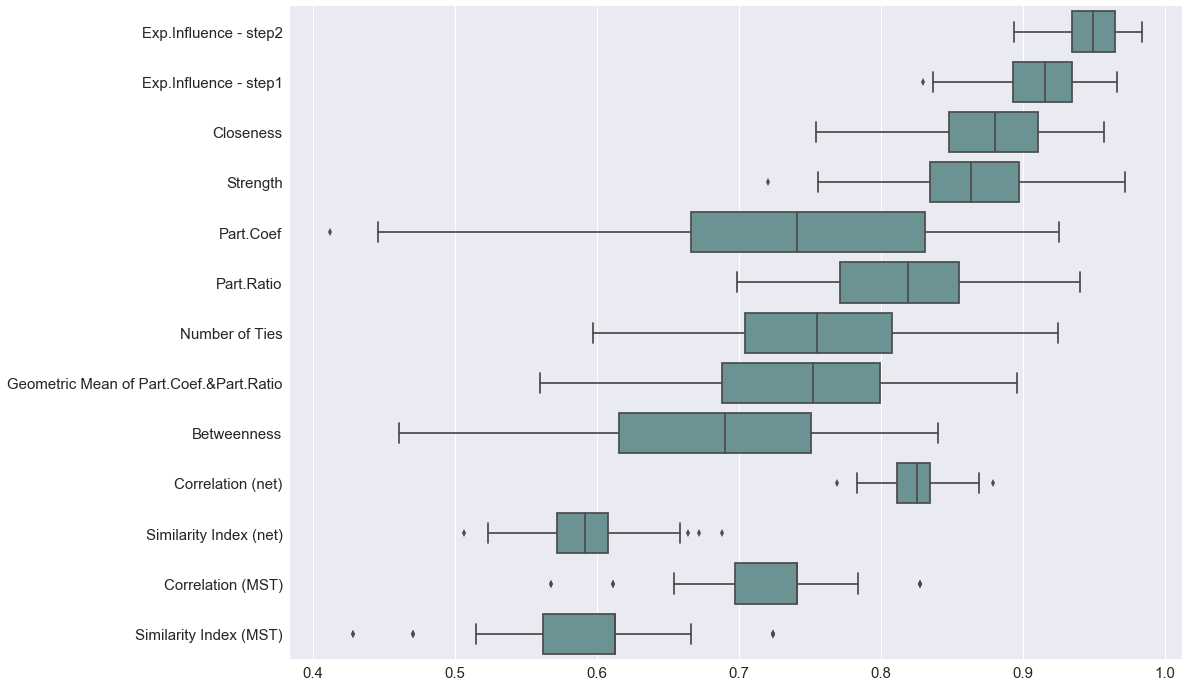


FIGURE 4: Boxplots of correlations for centrality measures, correlations and similarity indexes of network and MST matrices for each pair of split-half samples (*N*=100)

TABLE 6: *Descriptive of correlations for centrality measures, correlations and similarity indexes of network and MST matrices for each pair of split-half samples (N=100)*

|  | *Mean* | *SD* |
| --- | --- | --- |
| *Centrality measures* |  |  |
| Expected Influence - step2 | 0,95 | 0,019 |
| Expected Influence - step1 | 0,91 | 0,032 |
| Closeness | 0,88 | 0,045 |
| Strength | 0,86 | 0,047 |
| Participation Coefficient | 0,74 | 0,110 |
| Participation Ratio | 0,82 | 0,058 |
| Number of Ties | 0,75 | 0,073 |
| Geometric Mean of Participation Coefficient  & Participation Ratio | 0,74 | 0,080 |
| Betweenness | 0,68 | 0,086 |
| *Network and MST* |  |  |
| Correlation (network) | 0,82 | 0,019 |
| Similarity Index (network) | 0,59 | 0,032 |
| Correlation (MST) | 0,72 | 0,056 |
| Similarity Index (MST) | 0,59 | 0,065 |

TABLE 7: *Descriptive of differences in networks estimated for each split-half pair (N =100)*

| *Difference between*  *two split-half samples* | *Mean*  *difference* | *SD* | *Min.*  *difference* | *Max.*  *difference* | *Mdn*  *difference* |
| --- | --- | --- | --- | --- | --- |
| Number of Ties | 6,35 | 4,4139 | 0 | 23 | 5 |
| Mean of absolute weights | 0,005 | 0,0033 | 0, 00009 | 0,015 | 0,004 |
| Sum of weights | 0,024 | 0,0023 | 0,016 | 0,030 | 0,024 |
| Maximal edge difference* | 0,178 | 0,0263 | 0,1187 | 0,258 | 0,180 |
| Proportion of Negative ties | 0,021 | 0,0143 | 0,001 | 0,064 | 0,018 |
| Sum of Negative weights | 0,007 | 0,0045 | 0, 00008 | 0,020 | 0,006 |
| Sum of Positive weights | 0,006 | 0,0043 | 0,0000007 | 0,022 | 0,005 |

* The highest difference observed between two networks among all 325 edges

**6.2. Robustness analysis II: 100 random samples (80% of total sample, *N=*933538)**

As in the estimation of the whole network, the size of the sample is set on 4131, and the alpha is set to 0.001.


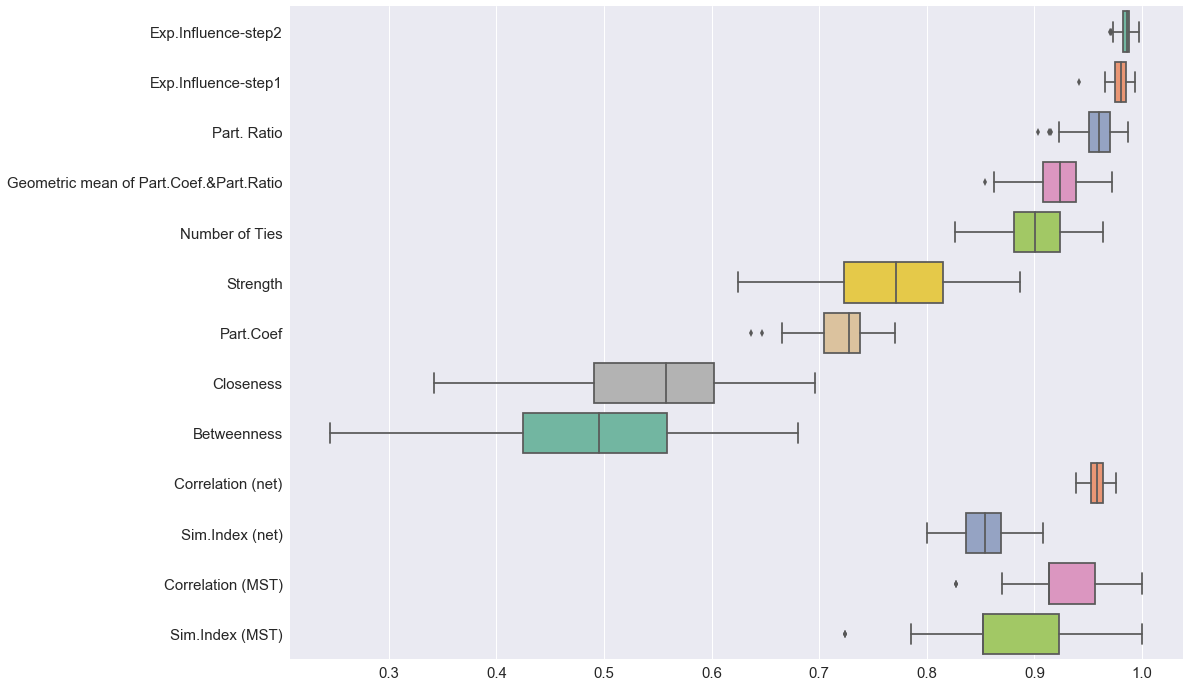


FIGURE 5: Boxplots of correlations for centrality measures, correlations and similarity indexes of network and MST matrices between total sample and each random sample (fraction=0.8, *N=* 100)

TABLE 8: *Descriptive of correlations for centrality measures, correlations and similarity indexes of network and MST matrices between total sample and each random sample (fraction=0.8, N= 100)*

|  | *Mean* | *SD* |
| --- | --- | --- |
| *Centrality measures* |  |  |
| Expected Influence-step2 | 0,98 | 0,006 |
| Expected Influence-step1 | 0,95 | 0,011 |
| Participation Ratio | 0,96 | 0,017 |
| Geometric mean of Participation Coefficient  & Participation Ratio | 0,92 | 0,024 |
| Number of Ties | 0,90 | 0,031 |
| Strength | 0,76 | 0,065 |
| Participation Coefficient | 0,72 | 0,028 |
| Closeness | 0,59 | 0,073 |
| Betweenness | 0,60 | 0,085 |
| *Network and MST* |  |  |
| Correlation (networks) | 0,96 | 0,008 |
| Similarity Index (networks) | 0,85 | 0,024 |
| Correlation (MST) | 0,93 | 0,044 |
| Similarity Index (MST) | 0,89 | 0,071 |


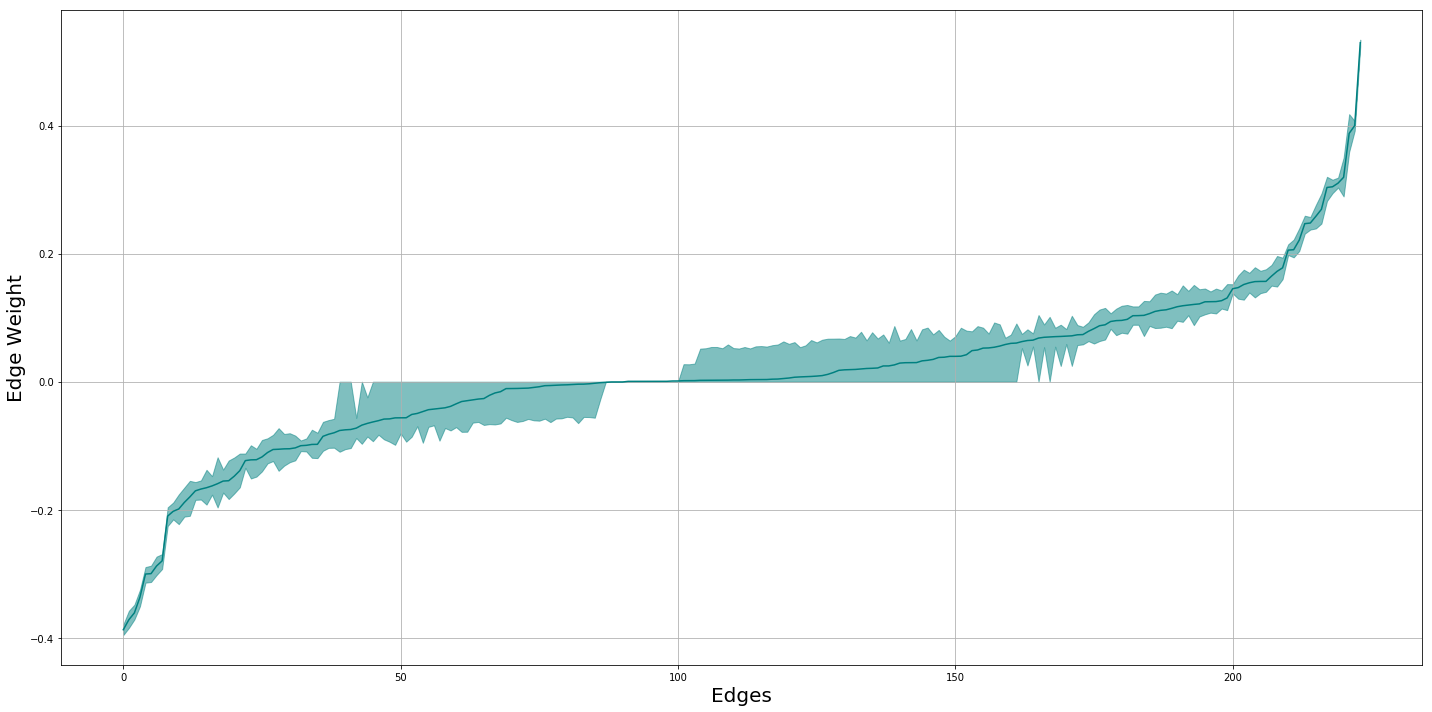


FIGURE 6: Means and confidence intervals of edge weights for 224 edges (out of 325) that had at least one non-zero weight in 100 random samples (0.8 fraction of total sample)

Network, and therefore each edge, is estimated in a sample consisting of 80% randomly selected cases 100 times. As noted before, in the calculation of partial correlations, N is set to be 4131, substantially lower than real number of cases (1 166 923). The purpose was to reduce statistical power due to the high presence of missing data. For all edges, average standard deviation of estimated edge weights was 0,011.

Out of 325 edge estimations for each network, 101 edges were always estimated as zero. Remaining 224 edges had been estimated as non-zero at least once, and they are shown in Figure 9 with confidence intervals (lower bound at 2.5 percentile value, upper bound at 97.5 percentile value), in order of the average weight. Among those 224 edges, moderately strong correlation is found between absolute weight and variations in estimations (r=-0,43), showing that stronger edges are more reliably estimated. As it can be seen from Figure 9, the signs of edge estimations are completely consistent in all 100 networks for each edge, showing very high reliability in the edge signs.

Due to difficulty in showing labels of 224 edges on one Figure, the edges with the highest standard deviation of estimates (the least stable) are presented in Table 9, and the most reliable (non-zero) edges with lowest standard deviation in Table 10.

TABLE 9: *Ten percent of all non-zero edges (23) with highest variation in estimations*

| *Edge* | *Mean of*  *weights* | *SD* | *Min.*  *weight* | *Max.*  *weight* |
| --- | --- | --- | --- | --- |
| Empathy-Emotional stability | -0,047 | 0,034 | -0,098 | 0 |
| Life satisfaction-Intelligence | 0,033 | 0,034 | 0 | 0,089 |
| Empathy-Intelligence | 0,040 | 0,034 | 0 | 0,092 |
| Low Depression-Intelligence | 0,030 | 0,033 | 0 | 0,092 |
| Low Depression-Private body | -0,042 | 0,033 | -0,099 | 0 |
| Power-Extraversion | 0,033 | 0,033 | 0 | 0,085 |
| Power-Intelligence | 0,026 | 0,032 | 0 | 0,091 |
| Hedonism-Fair Mindedness | -0,031 | 0,032 | -0,088 | 0 |
| Universalism-Public body | -0,030 | 0,032 | -0,082 | 0 |
| Intelligence-Public body | 0,054 | 0,031 | 0 | 0,106 |
| Extraversion-Public body | 0,038 | 0,031 | 0 | 0,086 |
| Empathy-Openness | 0,035 | 0,031 | 0 | 0,081 |
| Power-Openness | -0,035 | 0,031 | -0,080 | 0 |
| Life satisfaction-Hedonism | 0,042 | 0,030 | 0 | 0,092 |
| Hedonism-Emotional stability | 0,021 | 0,030 | 0 | 0,092 |
| Self direction-Conscientiousness | -0,039 | 0,030 | -0,088 | 0 |
| Conscientiousness-Private body | 0,038 | 0,030 | 0 | 0,082 |
| Awareness of physical symp.-Conscientiousness | -0,026 | 0,030 | -0,084 | 0 |
| Low Depression-Agreeableness | -0,057 | 0,030 | -0,106 | 0 |
| Tradition-Low violent-occult interests | 0,030 | 0,029 | 0 | 0,075 |
| Tradition-Intelligence | -0,056 | 0,029 | -0,103 | 0 |
| Hedonism-Private body | 0,025 | 0,029 | 0 | 0,077 |
| Tradition-Private body | 0,050 | 0,029 | 0 | 0,098 |

TABLE 10: *Ten percent of all non-zero edges (23) with smallest variation in estimations*

| *Edge* | *Mean of*  *weights* | *SD* | *Min.*  *weight* | *Max.*  *weight* |
| --- | --- | --- | --- | --- |
| Low violent-occult int.-Conscientiousness | 0,071 | 0,006 | 0,057 | 0,087 |
| Intellectual int.-Public body | 0,094 | 0,006 | 0,079 | 0,108 |
| Fair Mindedness-Extraversion | 0,001 | 0,006 | 0 | 0,059 |
| Low Depression-Low violent-occult int. | 0,001 | 0,006 | 0 | 0,057 |
| Public body-Private body | 0,304 | 0,006 | 0,291 | 0,319 |
| Low violent-occult int.-Openness | -0,099 | 0,006 | -0,115 | -0,087 |
| Achievement-Self Disclosure | 0,001 | 0,005 | 0 | 0,054 |
| Wholesome activities int.-Public body | 0,001 | 0,005 | 0 | 0,054 |
| Awareness of physical symp.-Extraversion | -0,001 | 0,005 | -0,053 | 0 |
| Universalism-Self Disclosure | 0,001 | 0,005 | 0 | 0,053 |
| Tradition-Wholesome activities int. | 0,001 | 0,005 | 0 | 0,052 |
| Awareness of physical symp.-Public body | -0,001 | 0,005 | -0,052 | 0 |
| Power-Low violent-occult int. | -0,001 | 0,005 | -0,052 | 0 |
| Self-monitoring-Awareness of physical symp. | 0,001 | 0,005 | 0 | 0,052 |
| Self-monitoring-Openness | 0,001 | 0,005 | 0 | 0,051 |
| Body competence-Private body | 0,248 | 0,005 | 0,236 | 0,262 |
| Body competence-Public body | 0,400 | 0,004 | 0,390 | 0,414 |
| Intellectual int. -Low violent-occult int. | -0,100 | 0,004 | -0,110 | -0,089 |
| Wholesome activities int.-Low militaristic int. | -0,387 | 0,004 | -0,399 | -0,374 |
| Intellectual int.-Openness | 0,205 | 0,004 | 0,197 | 0,215 |
| Wholesome activities int.-Low violent-occult int. | 0,145 | 0,004 | 0,134 | 0,156 |
| Wholesome activities int.-Intellectual int. | 0,310 | 0,004 | 0,301 | 0,320 |
| Low violent-occult int.-Low militaristic int. | 0,530 | 0,003 | 0,522 | 0,535 |

**7. Network of 26 psychological attributes**

**
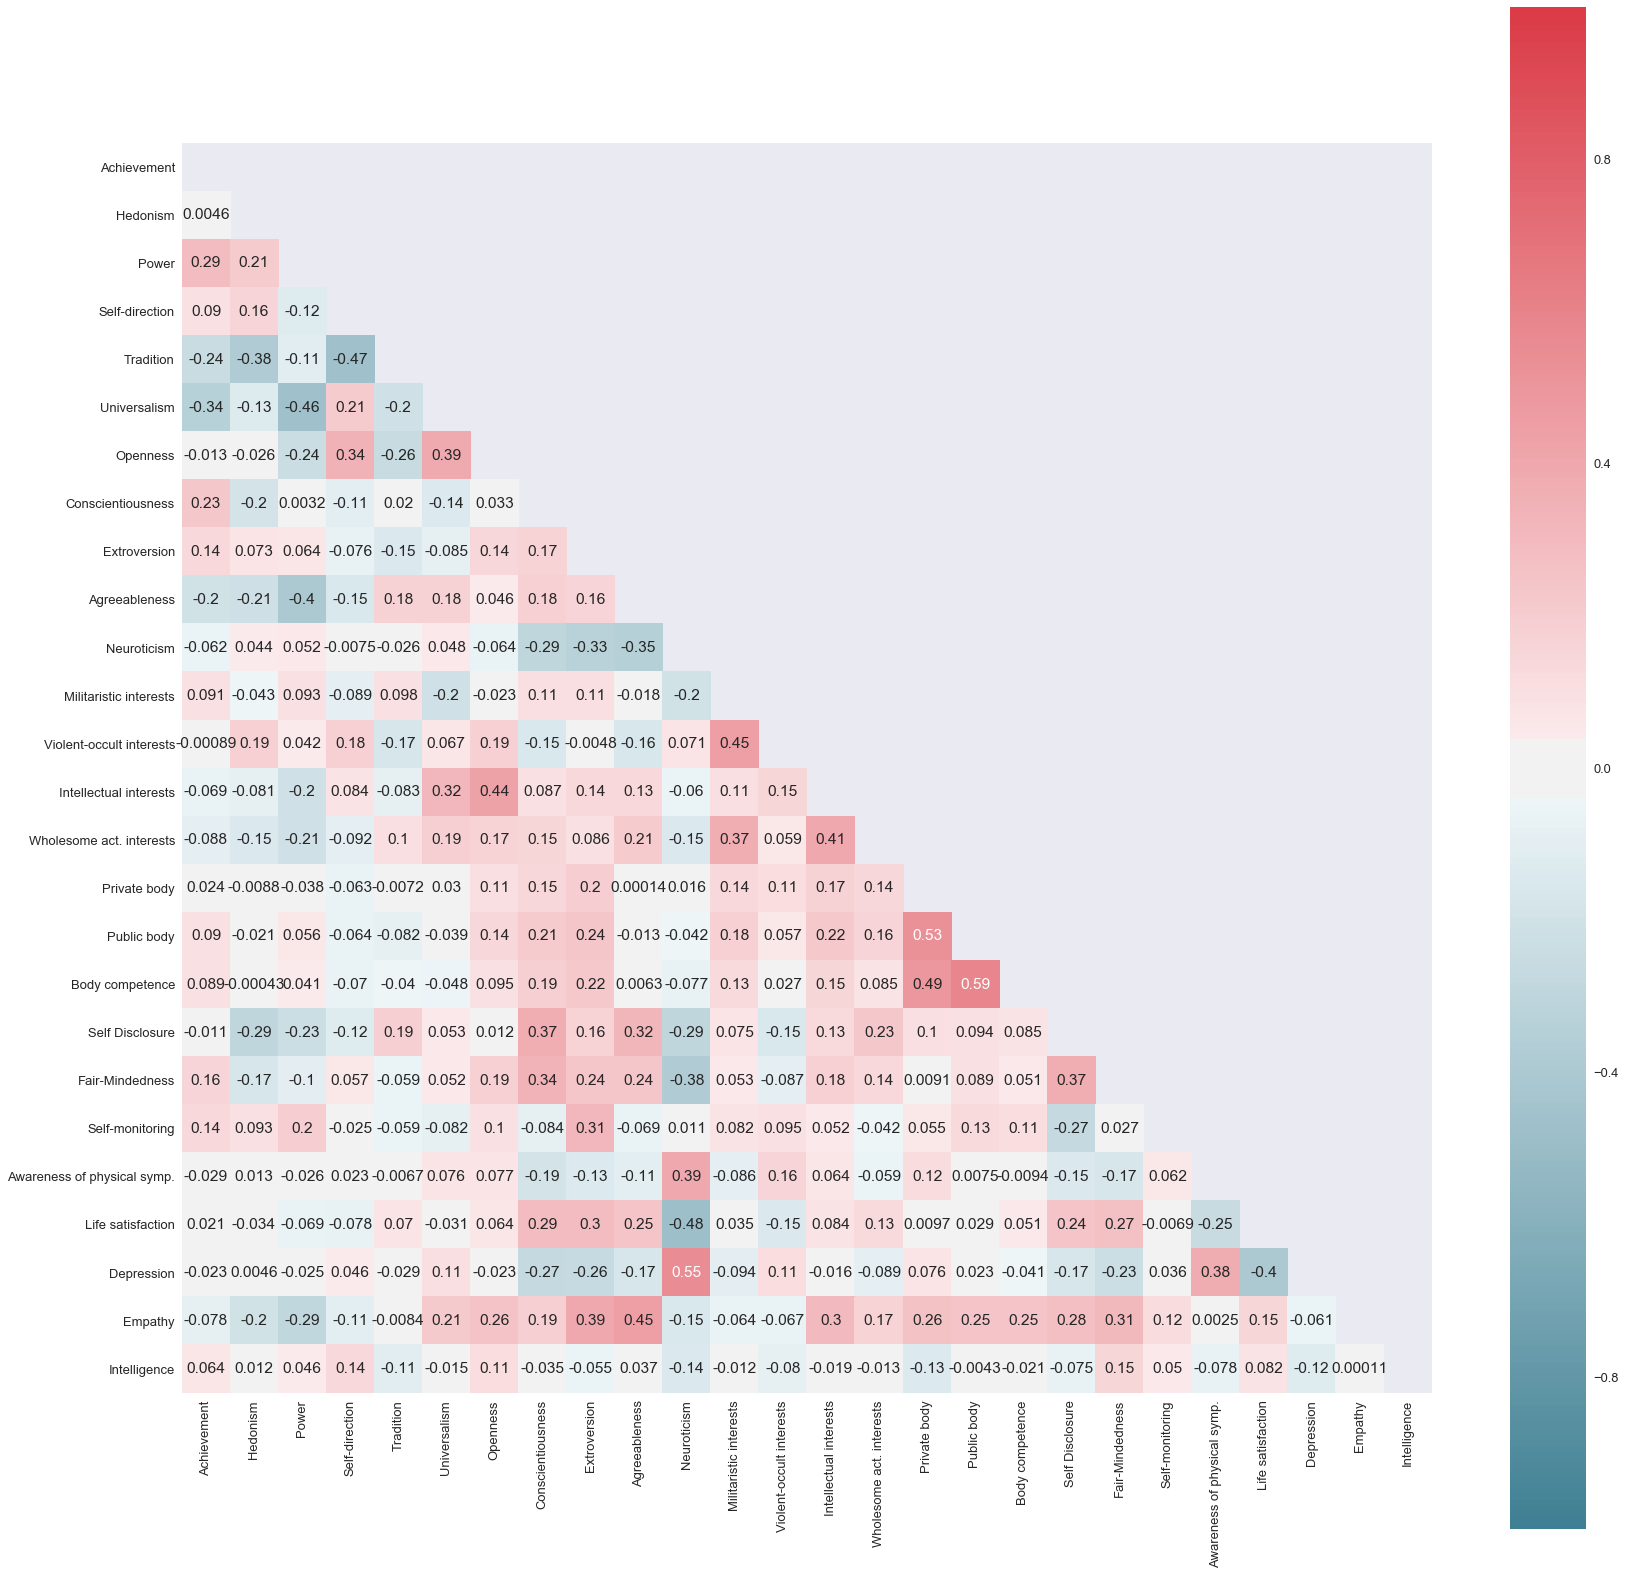
**

FIGURE 7: Pearson correlations between 26 psychological attributes

TABLE 11:*Descriptive of ties in correlation network*

|  | *Signed ties* | *Absolute weights* | *Positive ties* | *Negative ties* |
| --- | --- | --- | --- | --- |
| *Mean* | 0,04 | 0,14 | 0,15 | -0,11 |
| *SD* | 0,17 | 0,12 | 0,12 | 0,10 |
| *Min.* | -0,47 | 0,00 | 0,00 | -0,47 |
| *25%* | -0,07 | 0,05 | 0,06 | -0,15 |
| *Mdn* | 0,03 | 0,10 | 0,13 | -0,08 |
| *75%* | 0,15 | 0,19 | 0,21 | -0,04 |
| *Max.* | 0,59 | 0,59 | 0,59 | 0,00 |
| *N. of ties* | 325 | 325 | 193 | 132 |


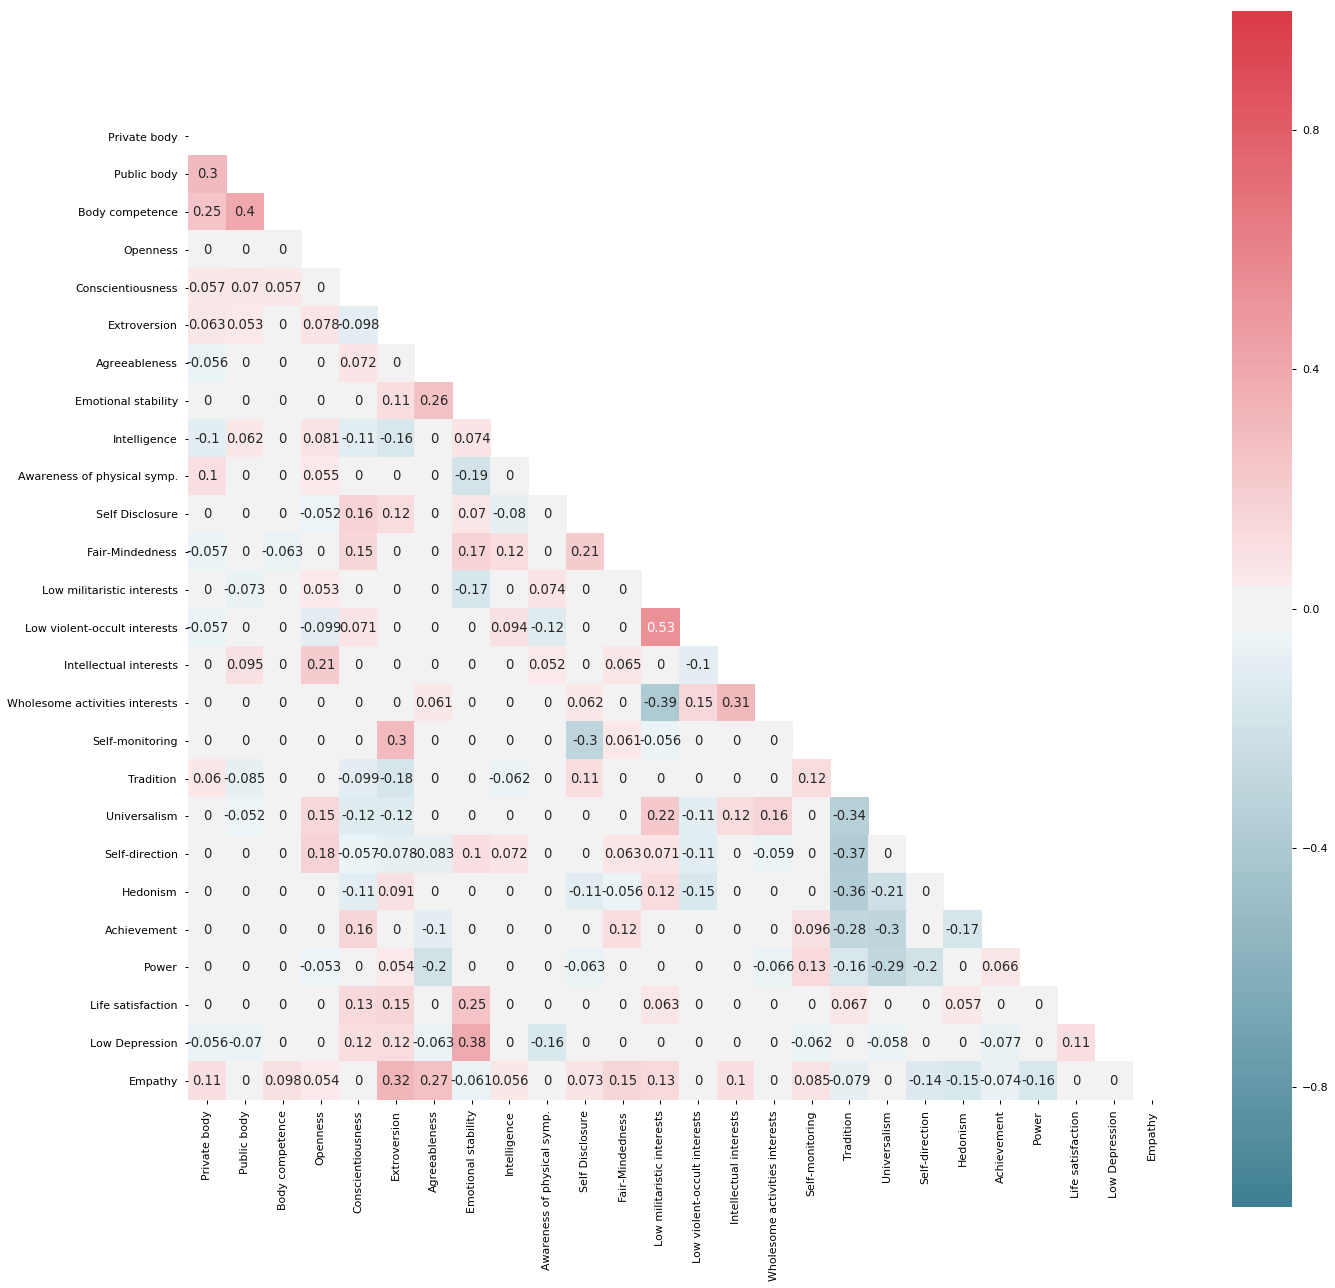


FIGURE 8: Non-regularized partial correlations between 26 psychological attributes


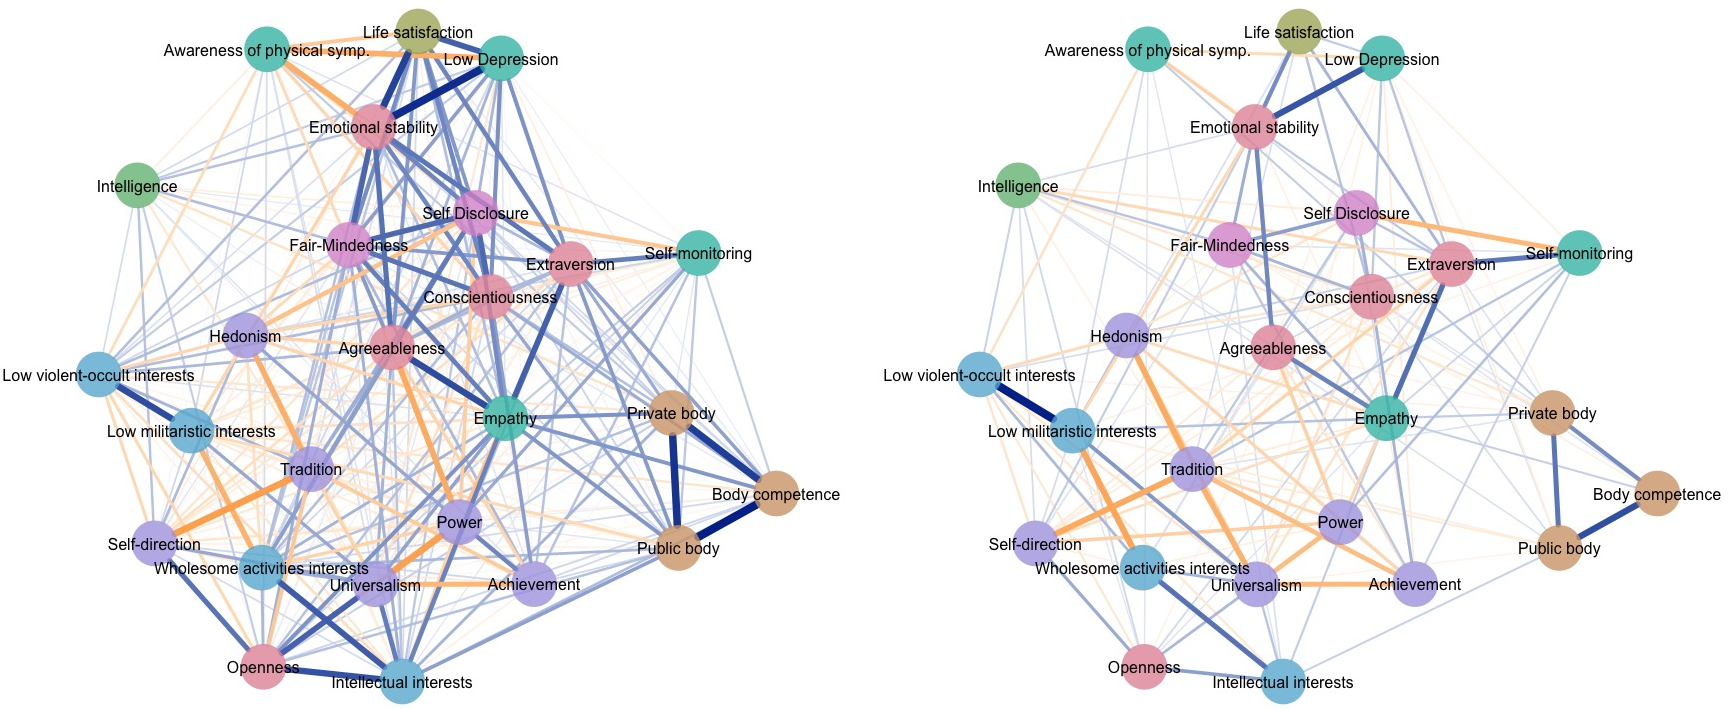


FIGURE 9: Correlation network (left) and partial correlation network (right) with the same layout

**8. Analysis of network ties**

In order to find out how positive and negative ties and their weights are related and distributed at the node level, for each node we calculated the number of positive and negative ties and the sum of their weights. Then we used Spearman’s coefficient to check whether having negative and positive edges is correlated across nodes. Since we were not only interested in the correlation, but also in whether the number and strength of two kinds of ties tends to be equal at the node level, we additionally computed the Shannon entropy measure[[1]](#footnote-1). A negative rank correlation of (-0.40) between the number of positive and negative ties reveals a moderate tendency for nodes which have more positive ties, to have a smaller number of negative ties, and vice versa. This tendency is somewhat higher when weights are considered (-0.43).

Entropy of positive and negative ties is higher than entropy of signed absolute weights (medians are 0.94 and 0.88, respectively, after transformation of entropy scores on the same scale with range from 0 to 1). In other words, the number of positive and negative links of a node are more unequal (different) than the sum of positive and negative weights. The two types of entropy are highly associated (0.78). The node with the highest entropy when the number of ties is considered is Agreeableness (4 positive, 5 negative), closely followed by Intelligence and Self-disclosure (7 pos. and 5 neg. ties, both). Life satisfaction has the lowest possible entropy (7 positive links), followed by Intellectual interests (7 pos. and 1 neg.). Intelligence has the highest entropy, while Body competence has the smallest entropy, when considering weights. For more details see Table 12 and 13.

TABLE 12: *All edge and weights related information for each node*

| *Node/variable* | *N (all) edges* | *Stre-ngth* | *N pos. edges* | *N neg. edges* | *Sum*  *pos. edge*  *weights* | *Sum*  *neg. edge*  *weights* | *H edges* | *H weights* |
| --- | --- | --- | --- | --- | --- | --- | --- | --- |
| Achievement | 10 | 1,44 | 4 | 6 | 0,435 | -1,009 | 0,980 | 0,884 |
| Agreeableness | 9 | 1,16 | 4 | 5 | 0,663 | -0,502 | 1 | 0,988 |
| Awareness of physical symptoms | 7 | 0,75 | 4 | 3 | 0,283 | -0,468 | 0,994 | 0,957 |
| Body competence | 5 | 0,87 | 4 | 1 | 0,804 | -0,063 | 0,728 | 0,378 |
| Conscientiousness | 16 | 1,63 | 10 | 6 | 1,044 | -0,589 | 0,963 | 1 |
| Emotional stability | 11 | 1,84 | 8 | 3 | 1,420 | -0,416 | 0,853 | 1 |
| Empathy | 17 | 2,11 | 11 | 6 | 1,448 | -0,663 | 0,945 | 1 |
| Extraversion | 16 | 2,11 | 11 | 5 | 1,476 | -0,638 | 0,904 | 1 |
| Fair-Mindedness | 12 | 1,29 | 9 | 3 | 1,110 | -0,176 | 0,819 | 1 |
| Hedonism | 11 | 1,61 | 3 | 8 | 0,273 | -1,332 | 0,853 | 0,659 |
| Intellectual interests | 8 | 1,05 | 7 | 1 | 0,950 | -0,100 | 0,548 | 0,455 |
| Intelligence | 12 | 1,08 | 7 | 5 | 0,561 | -0,514 | 0,989 | 1 |
| Life satisfaction | 7 | 0,82 | 7 | 0 | 0,825 | 0 | 0 | 0 |
| Low Depression | 11 | 1,27 | 4 | 7 | 0,728 | -0,541 | 0,954 | 0,986 |
| Low militaristic int. | 12 | 1,94 | 8 | 4 | 1,263 | -0,682 | 0,927 | 1 |
| Low violent-occult int. | 11 | 1,59 | 4 | 7 | 0,840 | -0,754 | 0,954 | 0,999 |
| Openness | 11 | 1,05 | 8 | 3 | 0,851 | -0,203 | 0,853 | 0,708 |
| Power | 11 | 1,45 | 3 | 8 | 0,252 | -1,194 | 0,853 | 0,668 |
| Private body | 12 | 1,27 | 7 | 5 | 0,941 | -0,330 | 0,989 | 0,827 |
| Public body | 10 | 1,26 | 6 | 4 | 0,984 | -0,279 | 0,980 | 0,763 |
| Self-disclosure | 12 | 1,42 | 7 | 5 | 0,815 | -0,608 | 0,989 | 0,986 |
| Self-direction | 13 | 1,58 | 5 | 8 | 0,487 | -1,096 | 0,970 | 0,892 |
| Self-monitoring | 9 | 1,21 | 6 | 3 | 0,797 | -0,418 | 0,927 | 0,930 |
| Tradition | 14 | 2,38 | 4 | 10 | 0,360 | -2,018 | 0,871 | 0,615 |
| Universalism | 13 | 2,24 | 4 | 9 | 0,645 | -1,600 | 0,899 | 0,866 |
| Wholesome act. int. | 8 | 1,25 | 5 | 3 | 0,735 | -0,513 | 0,963 | 0,978 |

*H – Shannon entropy measure

TABLE 13: *Correlations between edge related descriptives on the node-level*

|  |  | *2* | *3* | *4* | *5* | *6* | *7* | *8* |
| --- | --- | --- | --- | --- | --- | --- | --- | --- |
| *1. N of pos. edges* | | -0,40 | 0,86 | 0,38 | 0,42 | 0,12 | -0,09 | 0,001 |
| *2. N of neg. edges* | |  | -0,43 | -0,90 | 0,62 | 0,70 | 0,25 | 0,24 |
| *3. Sum of pos. edge weights* | |  |  | 0,43 | 0,27 | 0,17 | -0,20 | -0,07 |
| *4. Sum of neg. edge weights* | |  |  |  | -0,56 | -0,76 | -0,20 | -0,28 |
| *5. N of (all) edges* |  |  |  |  |  | 0,79 | 0,11 | 0,17 |
| *6. Strength* |  |  |  |  |  |  | -0,06 | 0,05 |
| *7. H of pos. and neg. edges (standardized)* | | |  |  |  |  |  | 0,78 |
| *8. H of pos. and neg. edge weights (standardized)* | | |  |  |  |  |  |  |

**9. Centrality analysis**

In addition to number of ties (degree), strength, closeness, betweennes, Participation coefficient, and Participation Ratio (explained in the main text), we used two centrality measures not commonly used in the network analysis: Expected influence – step one, and Expected influence – step two. We explain them in more details here.

***Expected influence –*** The strength of node is calculated by summing up the absolute values of all node’s edge weight. Hence, it is not differentiating between positive and negative weights. Robinaugh, Millner, and McNally [6] introduced two measures of a node’s influence in an undirected network addressing the presence of negative edges and therefore can differentiate nodes that may have little cumulative influence on network activation due to similar sum of negative and positive edge weights:

1. Expected influence 1(one step, ) - measures node’s influence on the nodes to which it is directly connected. The formula is the same as for the strength with the crucial difference that it preserves negative and positive value of the edge weight:

where is a binary adjacency matrix (presence and absence of ties), and is weighted and signed adjacency matrix.

1. Expected influence 2 (two step, ) - measures the secondary influence of a node by taking into account the expected influence of their neighbours. The formula is:

where is the expected influence – step one, plus the sum of those values for other nodes multiplied by edge weight between pair of nodes.

TABLE 14: *Descriptive statistics of nine centrality measures (N=26)*

|  | *Mean* | *Median* | *S.D.* | *Kurtosis* | *Skewness* | *Min.* | *Max.* |
| --- | --- | --- | --- | --- | --- | --- | --- |
| *Number of ties* | 11,08 | 11,00 | 2,855 | 0,157 | 0,095 | 5,00 | 17,00 |
| *Strength* | 1,45 | 1,36 | 0,439 | -0,402 | 0,535 | 0,75 | 2,38 |
| *Betweenness* | 12,35 | 7,00 | 13,691 | -0,225 | 1,172 | 0,00 | 39,00 |
| *Closeness* | 0,004 | 0,004 | 0,0005 | -0,823 | -0,107 | 0,003 | 0,004 |
| *Exp.Iinfluence-step1* | 0,17 | 0,30 | 0,720 | 0,171 | -1,003 | -1,65 | 1,00 |
| *Exp.Iinfluence-step2* | 0,69 | 0,68 | 0,691 | -0,450 | 0,079 | -0,57 | 2,13 |
| *Participation Ratio* | 2,49 | 2,64 | 1,005 | -0,346 | 0,079 | 0,72 | 4,81 |
| *Participation Coefficient* | 0,71 | 0,73 | 0,112 | 0,742 | -0,870 | 0,42 | 0,88 |
| *Product of Participation Ratio*  *& Participation Coefficient* | 1,78 | 1,92 | 0,790 | -1,127 | 0,009 | 0,55 | 3,19 |

FIGURE 10: Unstandardized participation ratio, participation coefficient, and geometric mean

**10. Correlations between four centrality measures in the full network and in the MST**

FIGURE 11: Correlation coefficients (Pearson’s *r*) between four centrality measures for minimum spanning tree (MST) and the network (the “full” network)

TABLE 15: *Centrality scores of each node in MST (Gower’s distance)*


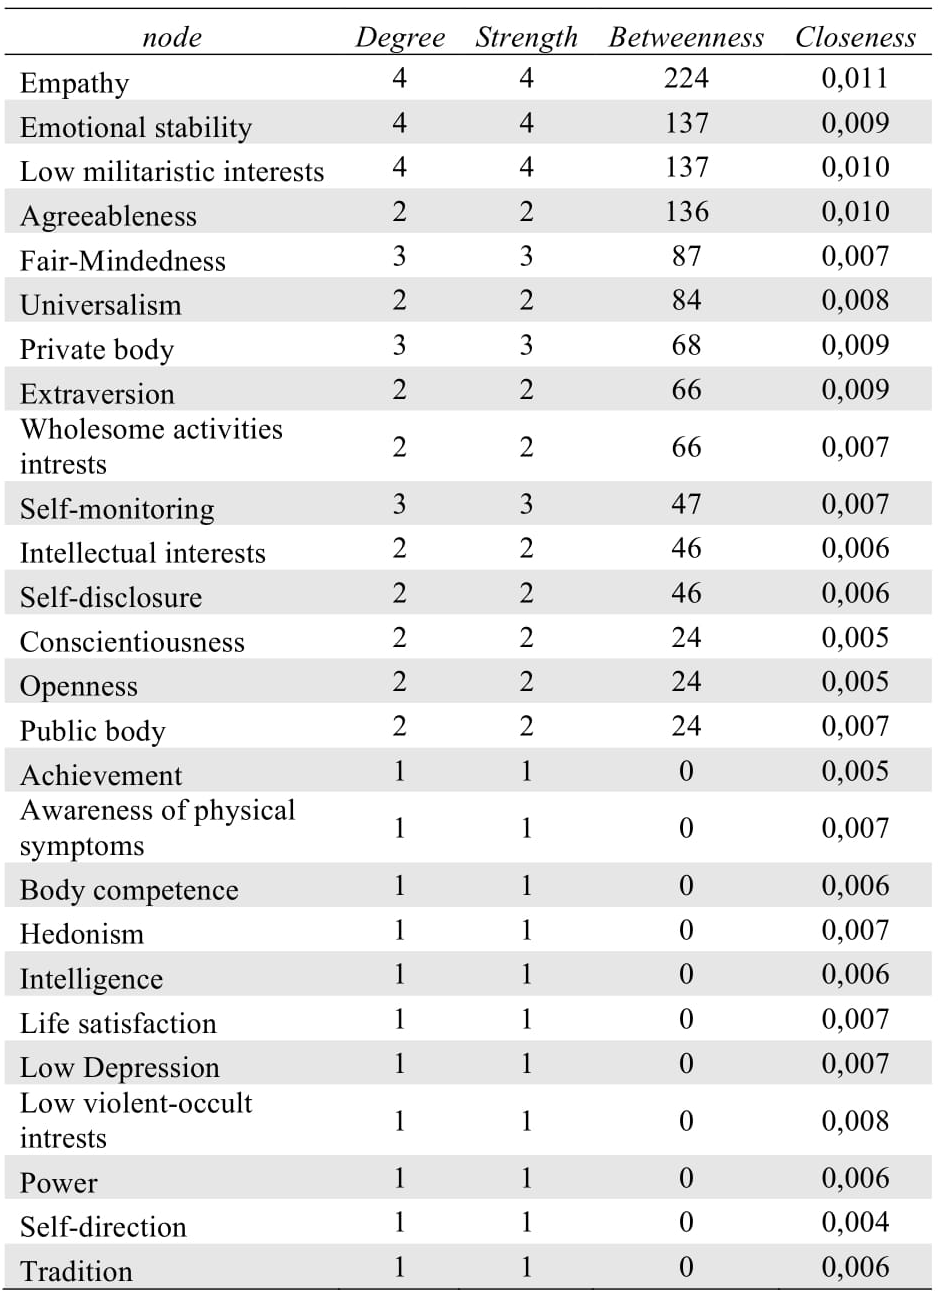


**11. MST with different distance measure**

To convert the partial correlations to distances, different equations can be used. In the simplest application, correlations (partial correlations in our case) are converted to distances by disregarding the direction of the correlation and subtracting the shared variance from 1, leading to distances *d* ranging from 0 to 1, see Equation 1. Alternatively, one can take the direction of the correlation into account by assigning the largest distance to a perfect negative correlation, and the smallest distance to a perfect positive correlation (as we have done in the manuscript), see Equation 2. The relationship between the (partial) correlation coefficient and the distance measure for both formulas are shown in Figure 12, and the distance computed for each tie are shown in Figures 13 and 14.

(1)

(2)


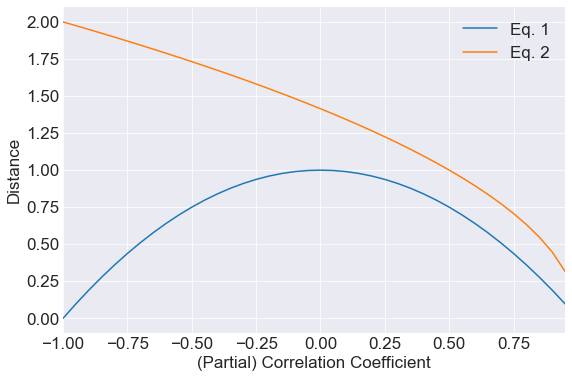


FIGURE 12: The relationship between *r* or *pr* with two distance measures


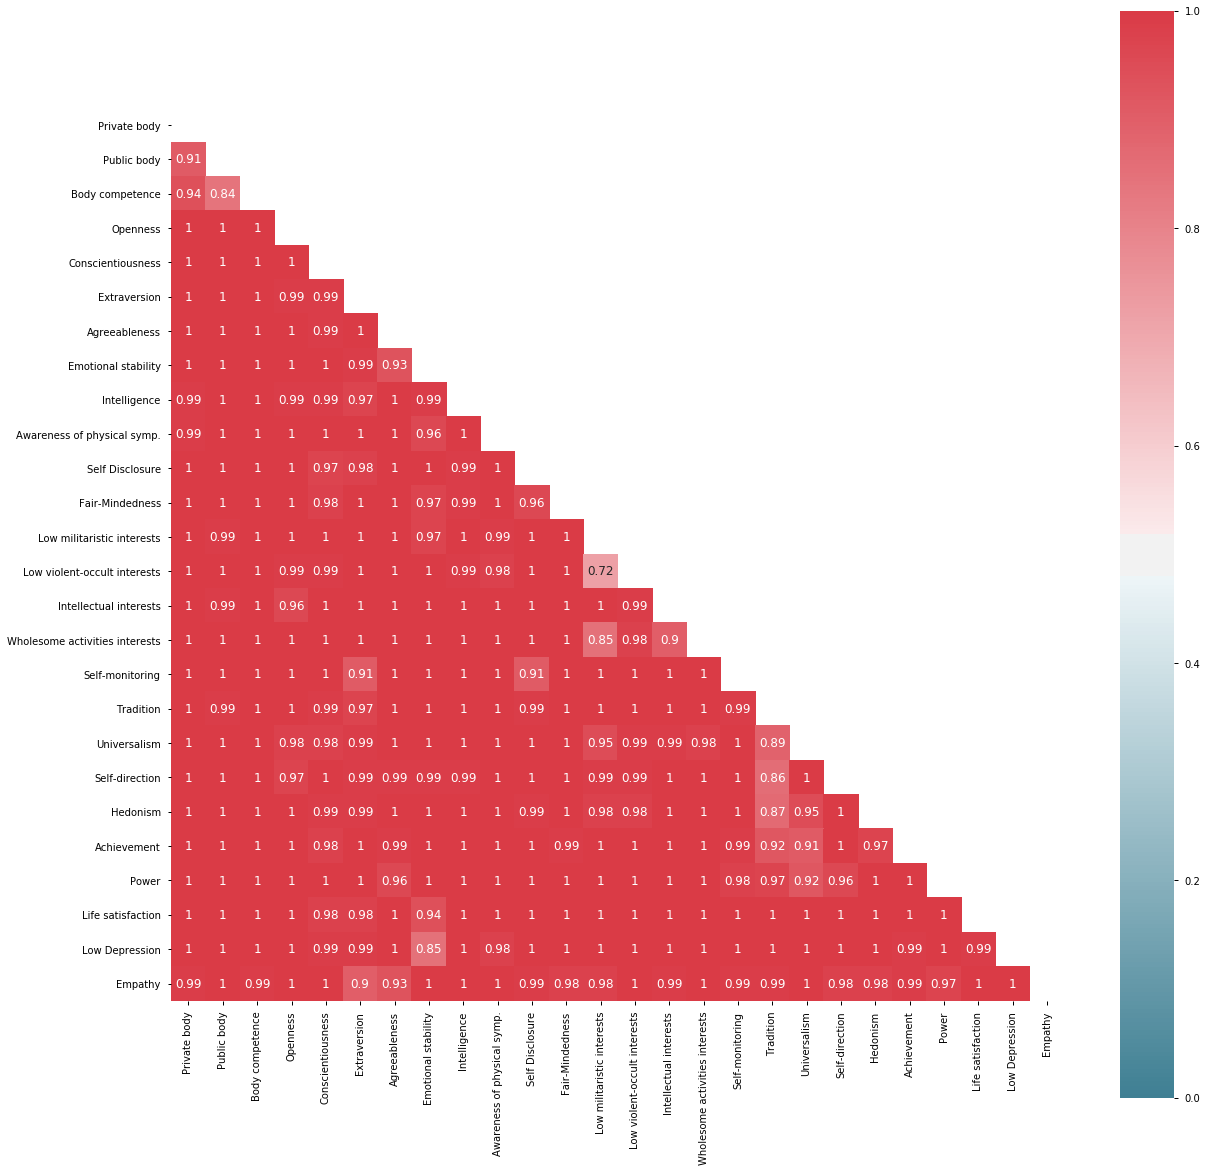


FIGURE 13: Distances between variables with Eq. 1


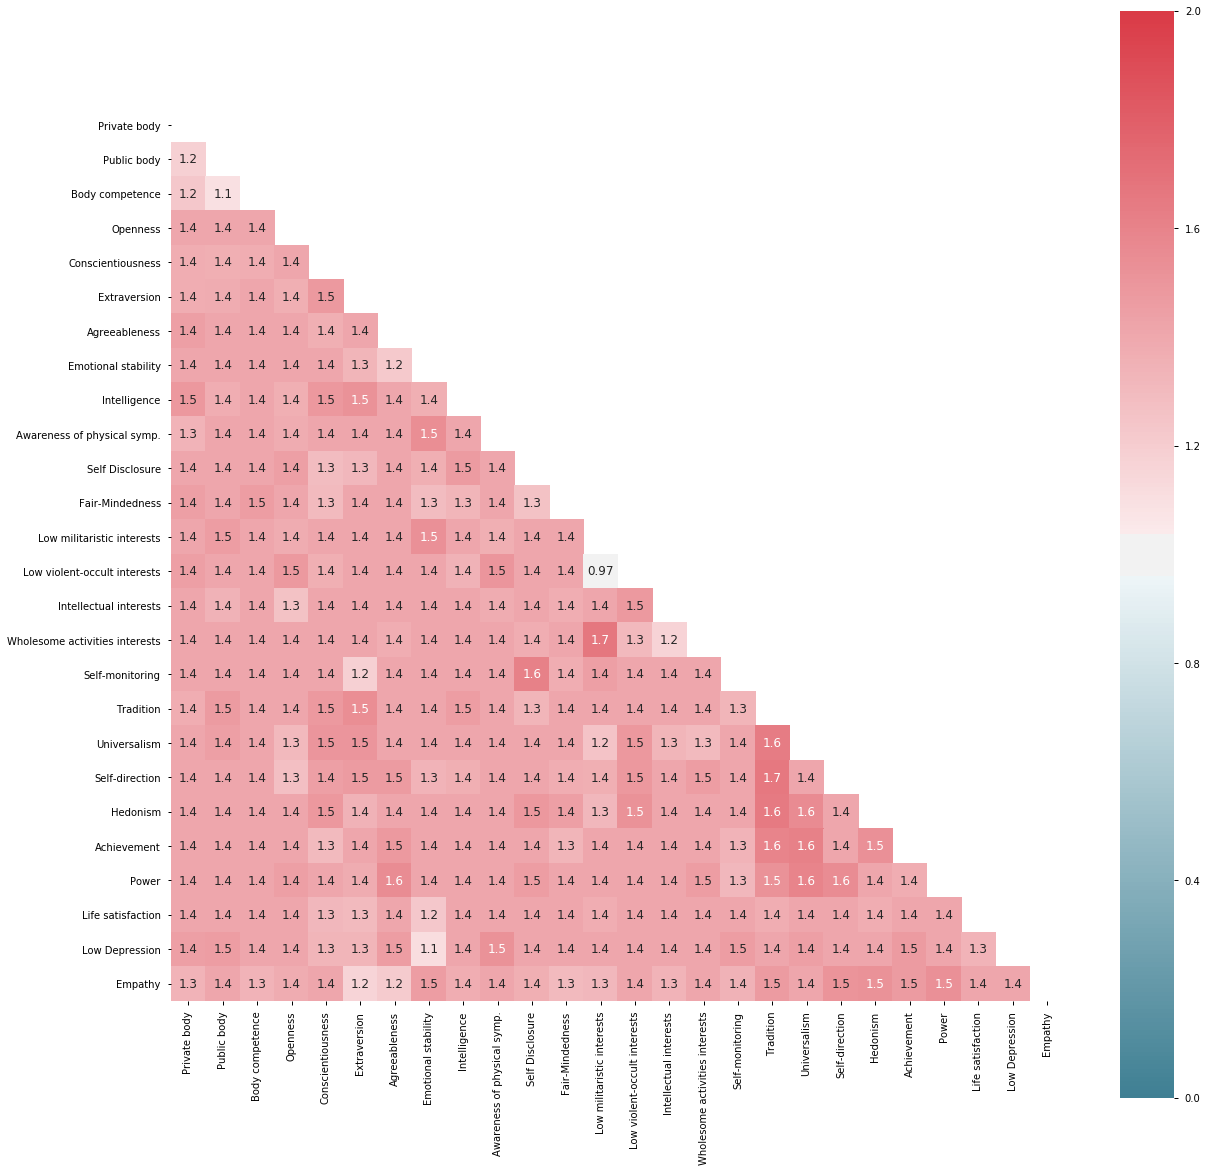


FIGURE 14: Distances between variables with Eq. 2

We computed the MST based on the distance measure inversely proportional to shared variance, shown in Figure 15.

FIGURE 15: Minimum spanning tree of the network based on distance inversely proportional to shared variance

MST based on Eq. 1, shown in the picture above, compared with the MST based on Eq. 2, shown in the manuscript (Figure 6 in the main article), is quite different. By visual inspection it is noticeable that the average shortest path, i.e., the average number of steps between any two nodes, is smaller in this MST (disregarding the direction of the partial correlations) than in the MST based on Gower’s formula (Eq.2). In other words, the differentiation between the nodes is smaller in comparison to the first MST. That is the result of the less sensitive distance measure in MST Eq.1 (see heat-maps – Figures 13 and 14). At the end, the hierarchical structure of MST Eq.1 will be less pronounced (less clear). The most central trait in the MST when not considering the direction of partial correlations is value Universalism, due to its ties to other values and Low militaristic interests. In difference with MST based on Eq. 2 where Intelligence branches out from Fair-Mindedness, here it branches out from the Extraversion.

The alignment of nodes on this MST follows more closely the pre-existing groups, except for Big five personality traits among which only Agreeableness and Emotional stability are directly connected.


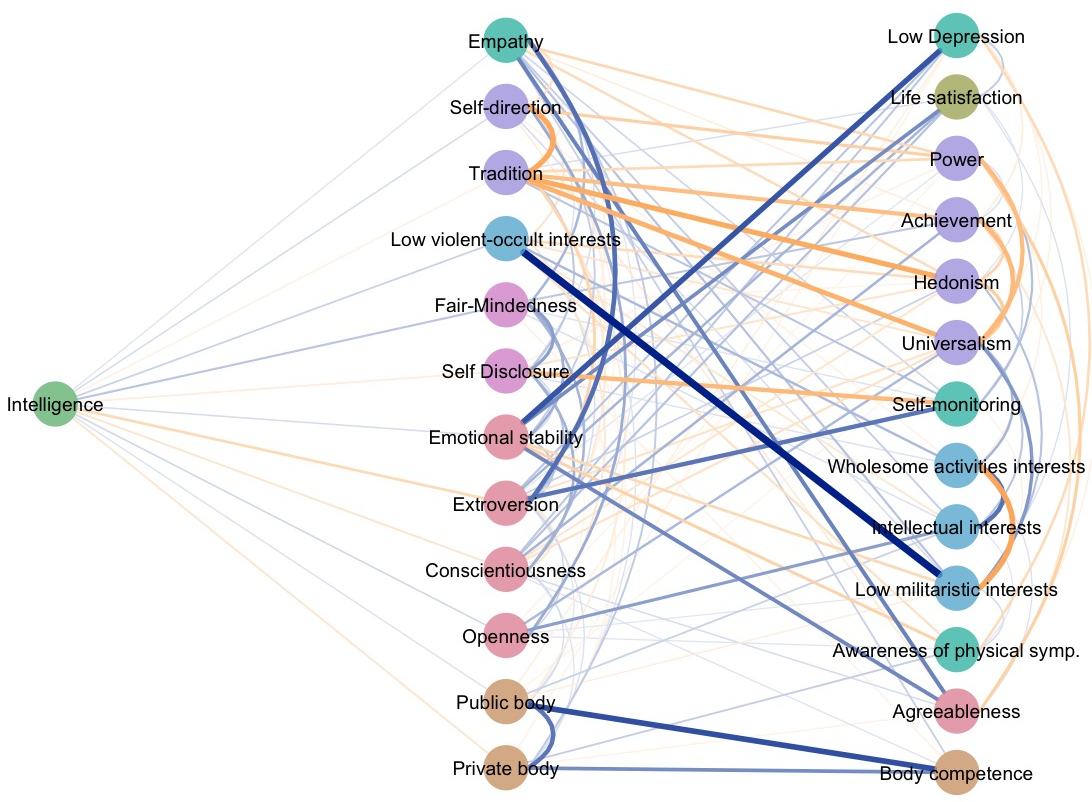


FIGURE 16`: Intelligence and its direct ties and indirect ties in the whole network.

**12. The effect of reverse coding on the analyses**

To check how reverse coding affects the results of our analyses, we proceed by recoding the individual values of Emotional stability. Emotional stability is chosen because it often coded negatively as Neuroticism in the literature.


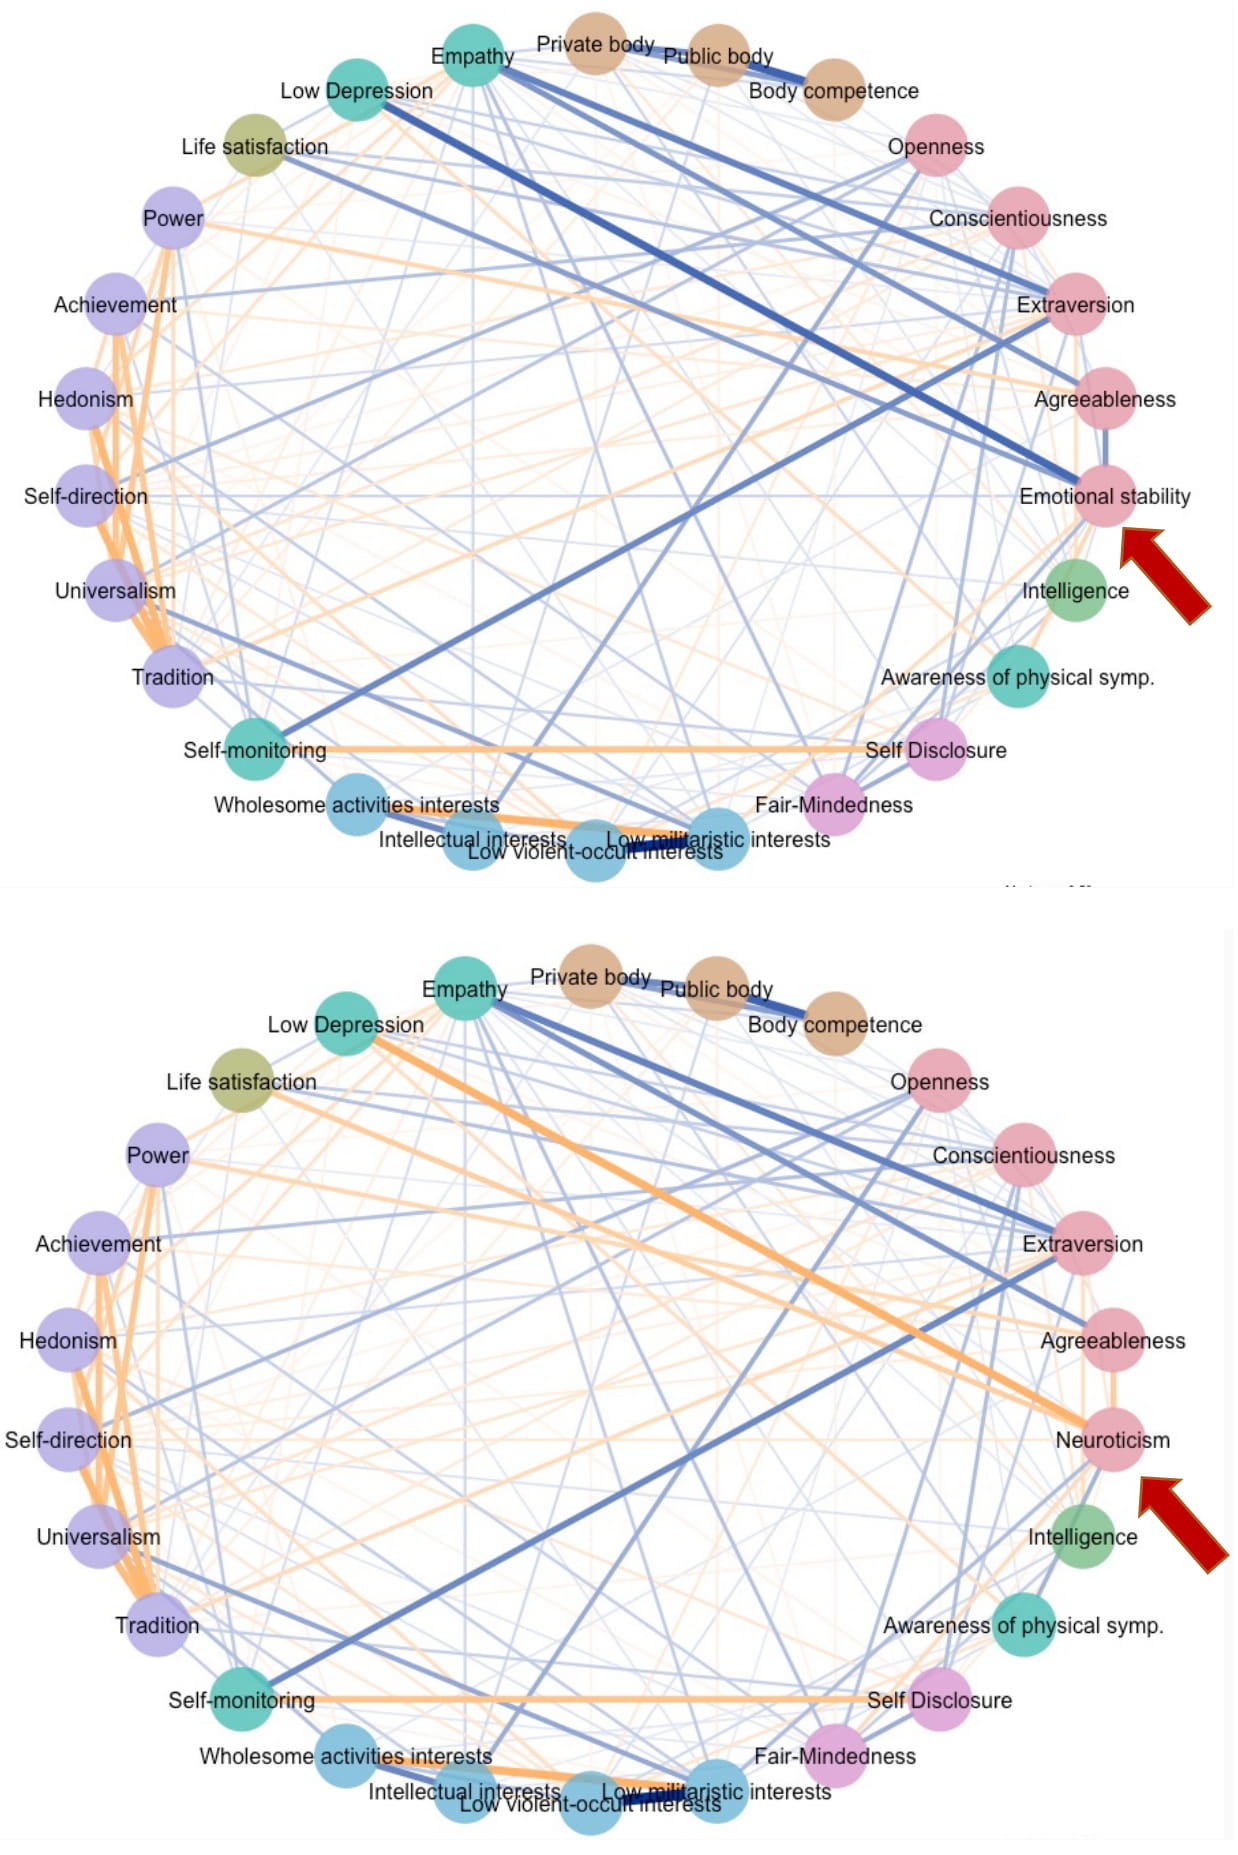


FIGURE 17: Emotional Stability, and after reversing the scores – Neuroticism in otherwise the same network (layout: circle). Red arrow points to the node before and after transformation.

Figure 17 shows two networks that are the same with the only difference being that in the first network node Emotional stability is reversed to Neuroticism in the second network. The circle layout is used for both networks to facilitate visual comparison. As it can be seen from the Figure, recoding resulted in change of the sign of all direct ties of the node Neuroticism. However, the absolute weights of all the ties and the sign of indirect ties in the network remained the same. An alternative way of showing the extent of difference is presented in Figure 18, where the same network is shown with the flow chart which clearly separates the node’s direct links and indirect links, showing the sign change in the first, and no change in the latter. (It also shows that Emotional Stability/Neuroticism has maximal distance of two to all nodes in the network).


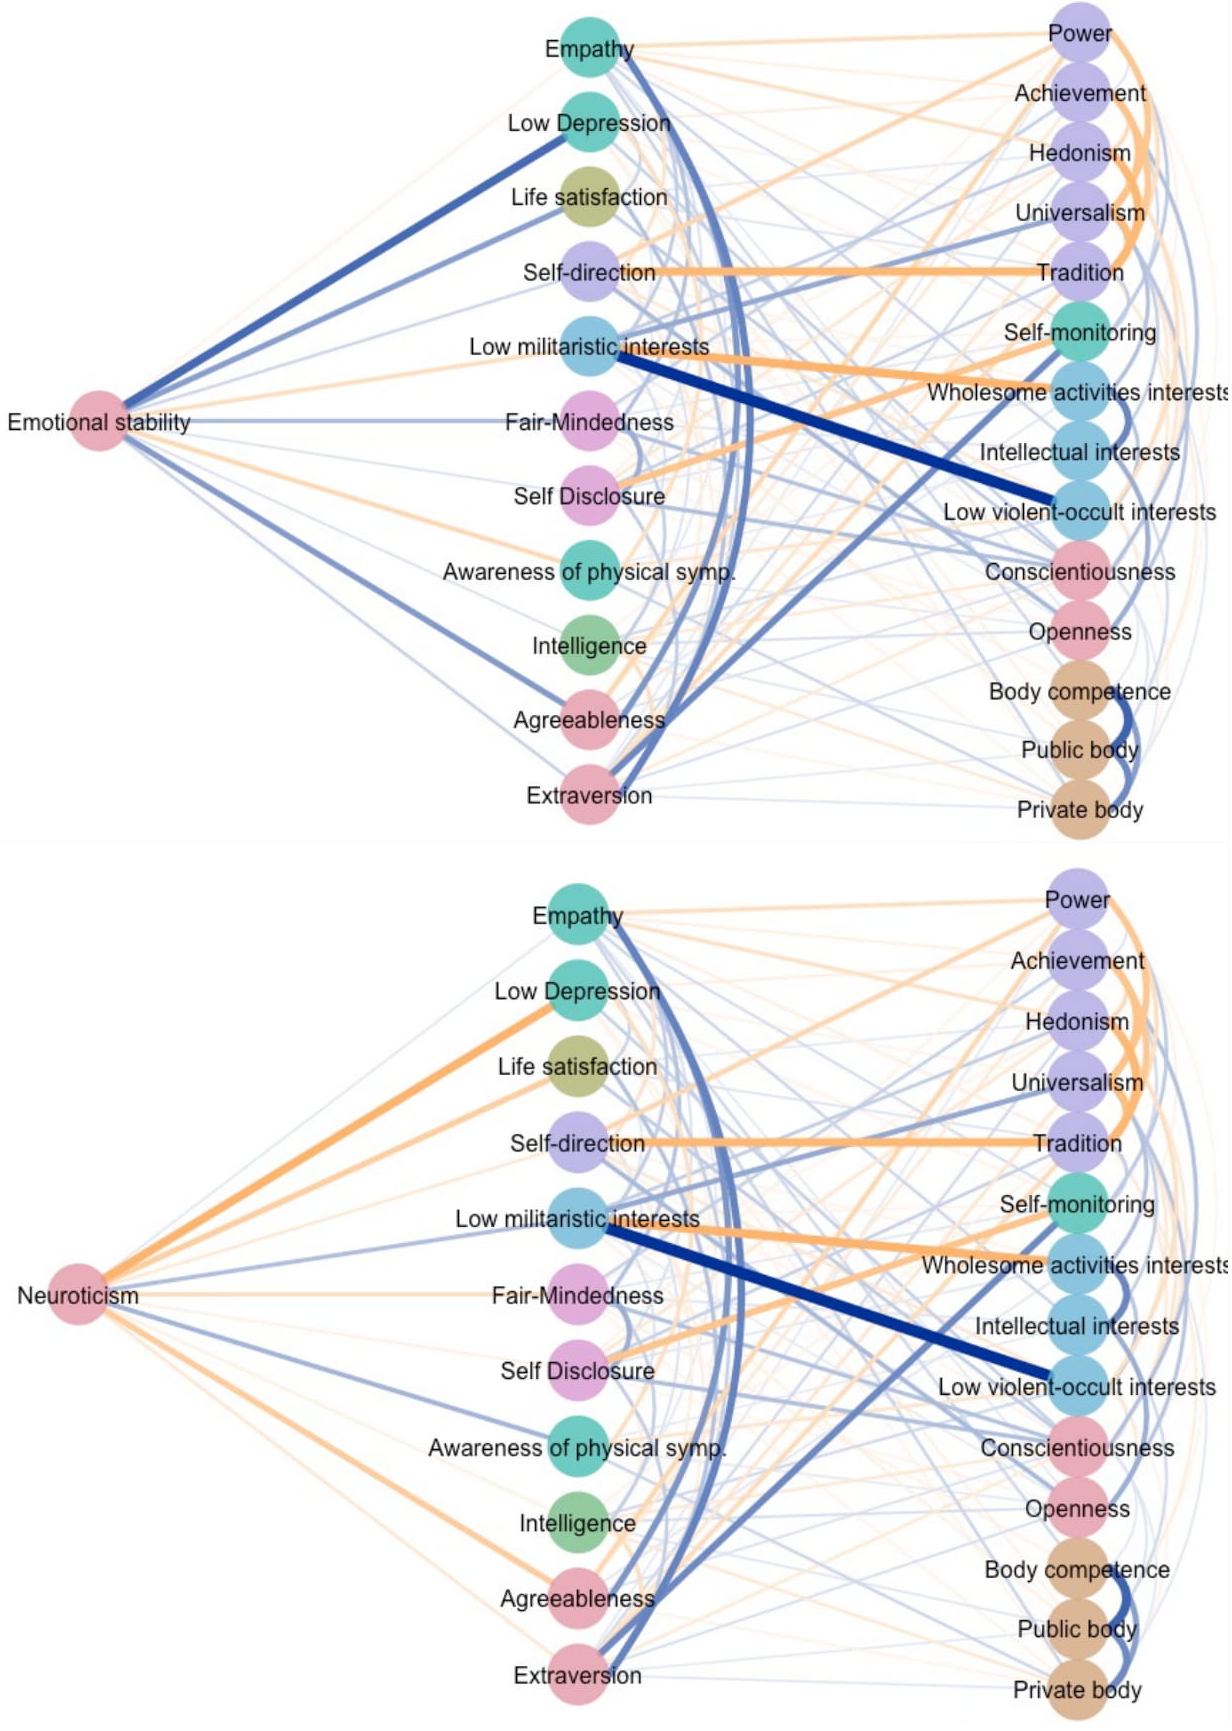


FIGURE 18: Flow chart of Emotional stability (up) and Neuroticism (down) in the same network

**12.1. The effect of reverse scoring on MST**

MST Eq.2 is sensitive to reverse coding, while MST Eq.1 is not. For example, if we reverse node Emotional stability to Neuroticism, and obtain MST with Eq. 2 for both networks, the resulting tree will differ from MST obtained for the network with Emotional stability, because all direct ties of the node Neuroticism will have the opposite sign (see Figure 19 in comparison with Figure 6 in the main article).

FIGURE 19: Minimum spanning tree of network with Neuroticism (reversed Emotional stability) based on distance that considers the sign of ties (directions of *pr*)

The placing of the node Emotional stability (ES)/Neuroticism (N) is different, and due to its associations with nodes Life satisfaction, Low depression, and Awareness of physical symptoms, the change affected their positions in the MST also. While in the first MST ES was placed among socially desirable nodes, when transformed to N, it moved to more “problematic” branch and connected with Awareness of Physical symptoms. The distance measure used has property to consider direction of association and in that way, provide more refined placing of nodes on the MST. However, in that case the interpretation is constrained only to coding of variables used in the study.

When MST Eq.1 is used the network stays the same. The Figure 20 is identical to Figure 15, only the name of the node is different.

FIGURE 20: Minimum spanning tree of network with Neuroticism (reversed Emotional stability) based on distance inversely proportional to shared variance

**12.2. The effect of reverse scoring on motif analysis**

In Figure 21 we show what change in edge sign(s) will happen within each triadic motif when different number and combination of nodes is reversed.

**
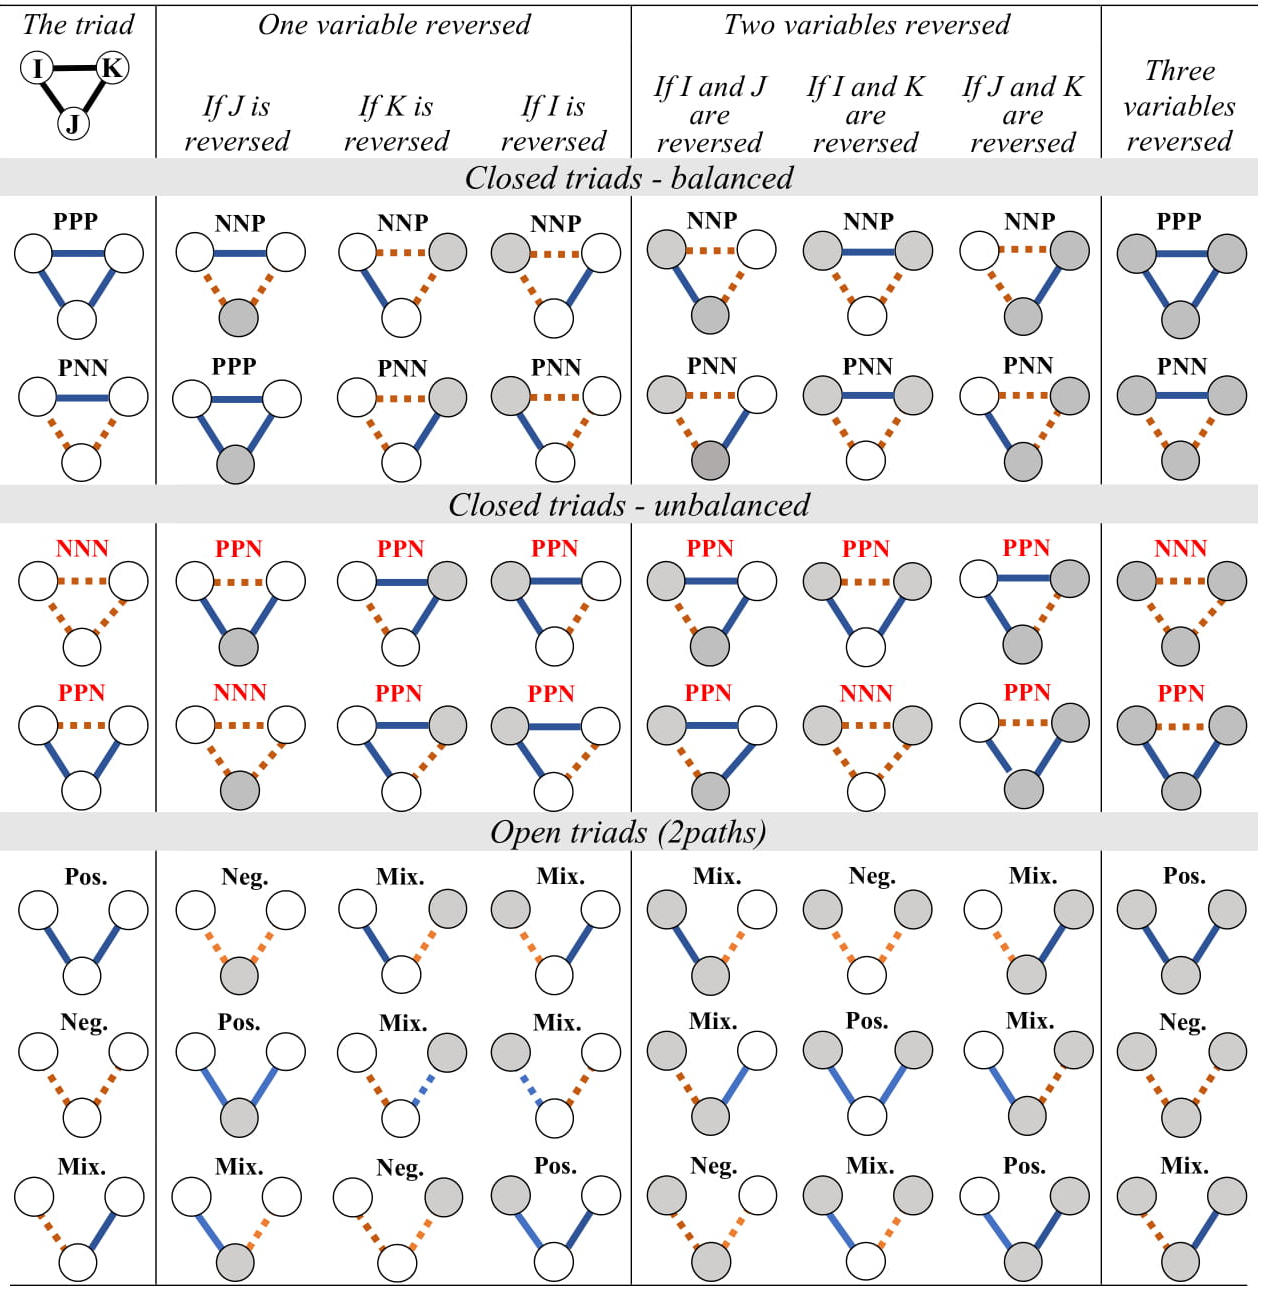
**

| LEGEND  Three-letter-code in black font – Balanced triads: PPP – a triad with three positive edges; PNN – a triad with one positive and two negative edges  Three-letter-code in red font – Unbalanced triads: NNN – a triad with three negative edges; PPN – a triad with two positive and one negative edge  Pos. – a 2-path (open triad) with two positive edges  Neg. – a 2-path (open triad) with two negative edges  Mix. – a 2-path (open triad) with one positive and one negative edge |
| --- |
| variable (node) |
| reversed variable (node) |
| positive edge |
| negative edge |

FIGURE 21: Changes in edge signs on triadic level with one, two, or all three nodes reversed

Reversing one or more nodes in any combination will lead to the change of a specific motif, but a closed triad will stay closed, and open triad will stay open. Within closed triads, balanced motif will always stay balanced, and an unbalanced motif will stay unbalanced. Specifically, PPN can become NNN (and vice versa), while PPP can become NNP (and vice versa). In the case of 2-path motifs, where no balanced and unbalanced motif exist, the motif can change in any of two other types of 2-paths, depending on which node(s) has (have) been reversed (see Figure 21). When all the nodes are reversed, each motif stays the same. Therefore, this transformation of the variable (here we are referring only to reversing the score of a variable, not to other kinds of transformations), will in almost all cases lead to changes in the frequency of motifs in which that node is involved. However, the presence or absence of edges and absolute values of their weights will not be affected. Additionally, the total number of balanced and unbalanced closed triads will stay identical. On a network level, the number of positive and negative ties will *likely* change[[2]](#footnote-2). For example, after reversing Emotional Stability (to Neuroticism), the distribution of weights has changed. Specifically, all node’s direct ties have changed their sign (shown in Figure 22.)


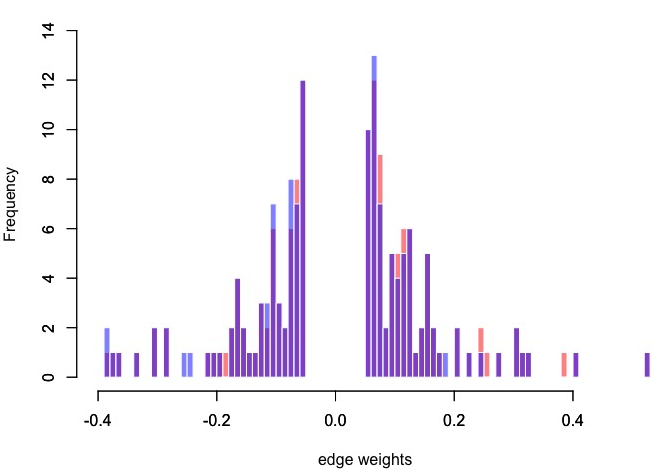


FIGURE 22: Distributions of weights of two networks: the network with Emotional stability (‘original’ network, in red) and network where Emotional stability is reversed to Neuroticism (in blue). In purple is the overlap between distributions.

Following from this, reversing a variable will affect results of measures which take the sign of edges into account. Namely, in addition to motif frequency, expected influence centrality and MST will produce different results.

While the frequency of motifs will be affected directly, their significance should not be affected in a greater extent. The reason for this expectation comes from the procedure of hypothesis testing of motif’s cardinality. Each motif’s frequency is compared against the distribution of 1000 random networks with the same structure and degree distribution. That means that change that happened due to reversing is controlled for – the degree distribution of all random networks changed to the degree distribution of the “new” network accordingly. Resulting *p*-value (or probability of the motif frequency) should converge to similar conclusions regarding the underrepresentation or overrepresentation of a given motif. However, some disparity should be expected due to random process included in producing the distribution of values according to the null model.

To check if our expectations were correct, we preformed the motif analysis on several versions of networks with reversed variables.

Firstly, we constructed five networks with reversed variables, three of them with just one variable reversed: Emotional Stability, Empathy, and Extraversion. These variables were selected because they had high number of ties, ensuring that their transformation will bring change to many triads in network. In the fourth network half of nodes (*n*=13) have been reversed without any selection criteria. Finally, in the fifth network all variables have been reversed. We proceeded with the identification of motifs, counting their frequency, calculating their intensity and coherence, and then compared those values against random distributions of networks generated for each network according to the null model which preserves the structure and weight distributions.

We present the results in Tables 16 and 17, together with results for “original” network presented in the main article.

TABLE 16: *Motif frequency for five networks*


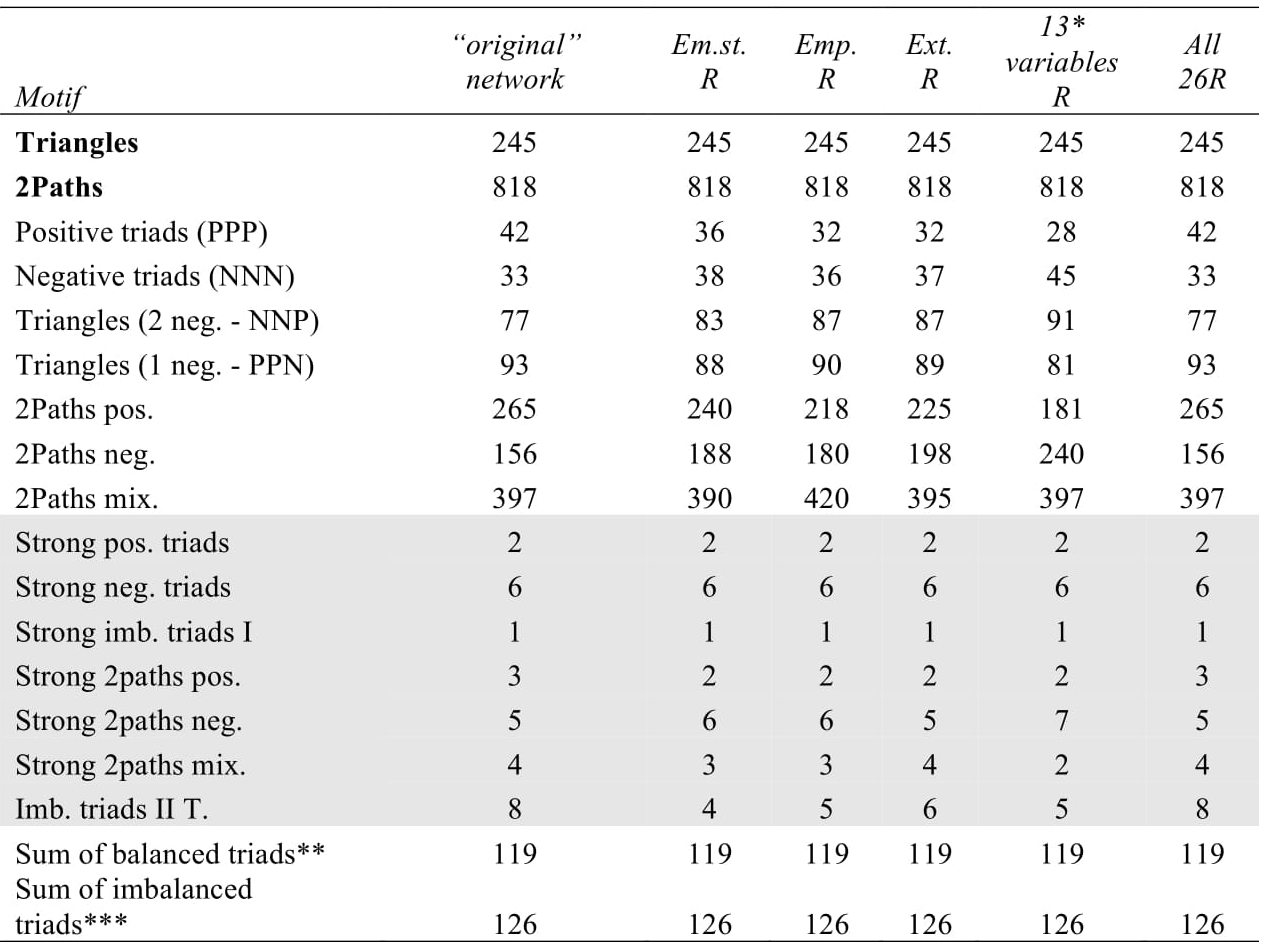


Abbreviations: Em.st. R – Emotional Stability reversed (“Neuroticism”); Emp. R – Empathy reversed (“Lack of empathy”);

Ext. R – Extraversion reversed (“Introversion”); Pos. – positive; Neg. – negative; Imb. – imbalanced

Bold letters – structural motifs

Grey cells – signed and weighted motifs

* 13 reversed variables/nodes are: Emotional stability, Self-disclosure, Militaristic interests, Low Violent-occult interests, Self-monitoring, Tradition, Universalism, Self-direction, Hedonism, Achievement, Power, Low Depression, and Empathy.

** Sum of PPP and NNP motifs frequencies

*** Sum of PPN and NNN motifs frequencies

Table 16 shows that the frequency of structural motifs (all triangles and 2-paths) – which look only at presence or absence of ties, while disregarding their sign and weights – is the same in all networks. This was expected – reversing any node(s) will not affect the presence of ties in the network or its structure.

The frequency of signed motifs – which take the sign of weights into consideration – is different for each network. Transforming variable(s) led to change of signs in the motifs which they are part of, resulting in a different number of their occurrence. Reversing more than one node (Table 16, see the column with frequency of motifs of network after half of the nodes are reversed) leads to bigger changes in the number of motifs than in networks with only one node reversed (third, fourth, and fifth column in Table 16). However, the network with all 26 variables reversed gives back the same frequency of all motifs, since as shown in Figure 21, when all variables in a triad are reversed, that will not affect its edge signs.

When zooming in on the “strong” motifs only – with a cut-off for tie weights and considering their signs as well – it is noticeable that frequency is low in all the networks and it shows relatively small variations. This is because they are rare in this network of many weak ties, and transforming the nodes will not affect their number in higher degree. However, the fact that strong positive triad, strong negative triad, and strong imbalanced triad I (with one negative tie) have the same frequency in all networks is coincidental. In the four networks with these specific nodes reversed (Emotional stability, Empathy, Extraversion, or 13 nodes), it does not affect the frequency of those motifs, but this does not mean they include the same nodes. That would be unlikely (but not impossible) and it depends on which nodes are involved in these strong motifs, and whether they have been transformed. Furthermore, the same frequency for these networks does not imply the same probability for those motifs. With the change of weight distribution in each of the networks, the probability of motifs occurrence changes accordingly.

TABLE 17: *Percentile values of motif frequency in 1000 random networks for five networks*


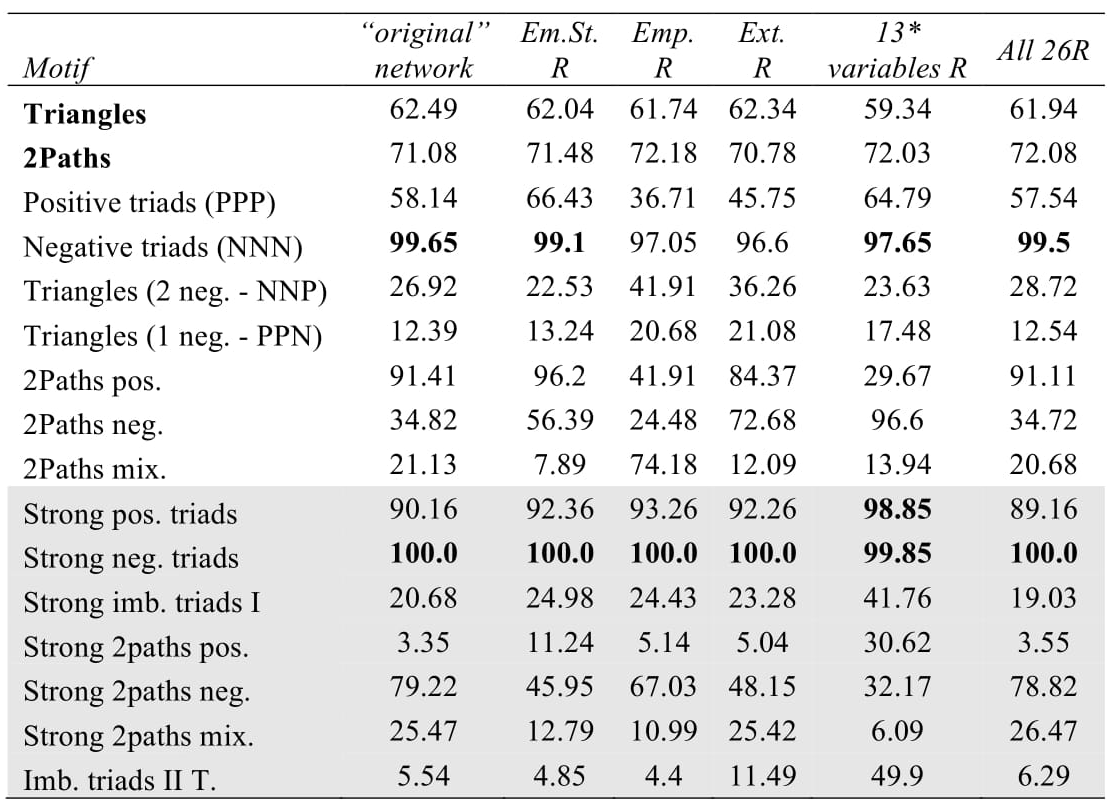


Abbreviations: Em.st. R – Emotional Stability reversed (“Neuroticism”); Emp. R – Empathy reversed (“Lack of empathy”); Ext. R – Extraversion reversed (“Introversion”); Pos. – positive; Neg. – negative; Imb. – imbalanced

Bold letters – structural motifs

Bold numbers – significant motifs

Grey cells – signed and weighted motifs

* 13 reversed variables/nodes are: Emotional stability, Self-disclosure, Militaristic interests, Low Violent-occult interests, Self-monitoring, Tradition, Universalism, Self-direction, Hedonism, Achievement, Power, Low Depression, and Empathy.

The percentile value is calculated by taking the value obtained from the empirical network and then determining its position against the distribution of those valued generated by 1000 random networks. It can be interpreted as probability of the motif occurrence in a random network. If the probability is lower than 2.5, or higher than 97.5 (two-tailed), it is interpreted as statistically significant occurrence under the used null model.

By inspection of the Table 17, several patterns can be seen. Firstly, triangles and 2-paths have similar percentile values for all networks. This is expected due to their same frequency and null model which controls for the structure. The small differences in their values are due to random process of creating 1000 random networks for each network separately.

Positive triads show similar, non-significant probabilities in all networks. Negative triads have less variation in percentile values, but since they are in the proximity of the upper cut-off value 97.5 for significance, they are not significant in two out of five networks. Similarly, strong positive triads, although with similar probabilities in all networks, they are shown to be significant in one of five. On the other hand, the frequency of strong negative ties is significant in all five networks. For all other motifs, probability of their occurrence varies more than for motifs previously discussed, but the conclusion about their significance is the same – they are not significant.

We can see from the results that the conclusions about the motif significance will tend to be the same (to converge) for all networks, regardless of whether some of nodes are reversed. However, we also can see that the results are not completely robust – they do lead sometimes to different conclusions about the motif significance. In those cases, however, other probabilities tend to be in the neighbourhood of the significance level. For not significant motifs, especially those that have one absent tie or not only positive or negative ties, probabilities vary more. Higher variability of estimated probabilities for several motifs may be explained by very constrained null model we have used – allowing only random swamping of weights among present edges. The consequence of such restrictions are smaller variations between randomly generated network, where even small differences in the frequency can lead to relatively big differences in p-values due to narrow distribution. The variability was further enhanced for those motifs that appear in very low frequency (e.g. one to six occurrences). Rather high agreement in probabilities of strong positive and strong negative motifs, despite their extremely low frequency is the result of their very skewed distributions (see Figure 11 in the main article). In conclusion, although results converge across networks with different number of nodes reversed, the consistence in estimated probability is not perfect, suggesting that future research will benefit from more refined null models.

TABLE 18: *Results of motif intensity and coherence analysis*

Abbreviations: Em.st. R – Emotional Stability reversed (“Neuroticism”); Emp. R – Empathy reversed (“Lack of empathy”); Ext. R – Extraversion reversed (“Introversion”); Pos. – positive; Neg. – negative; Imb. – imbalanced

Bold letters – structural motifs

Bold numbers – significant motifs

* 13 reversed variables/nodes are: Emotional stability, Self-disclosure, Militaristic interests, Low Violent-occult interests, Self-monitoring, Tradition, Universalism, Self-direction, Hedonism, Achievement, Power, Low Depression, and Empathy.

Table 18 shows the results for Intensity and Coherence of motifs across the same sample of networks (with the some nodes reversed). The pattern of results is similar to the results of the analysis of motif frequency – overall, estimations converge between networks, but the consistency is not perfect.

As a final note on presented networks with reversed nodes; it should be noted that we have presented only four of many possible networks with different number and combinations of nodes reversed. Although the consistency is not perfect, our results suggest that reversing nodes does not affect the estimation of their significance to a higher extent.

**13. Participation Coefficient based on empirical (data-driven) communities**

Louvian community detection algorithm based on modularity optimization and a hierarchical approach (for more details see [7] detected five communities (Figure 23), and those affiliations have been used for the calculation of PCs, shown in Figures 24 and 25 (note the same issue with Empathy and Extraversion having higher GM than PC and PR as for GM presented in the main article).

**
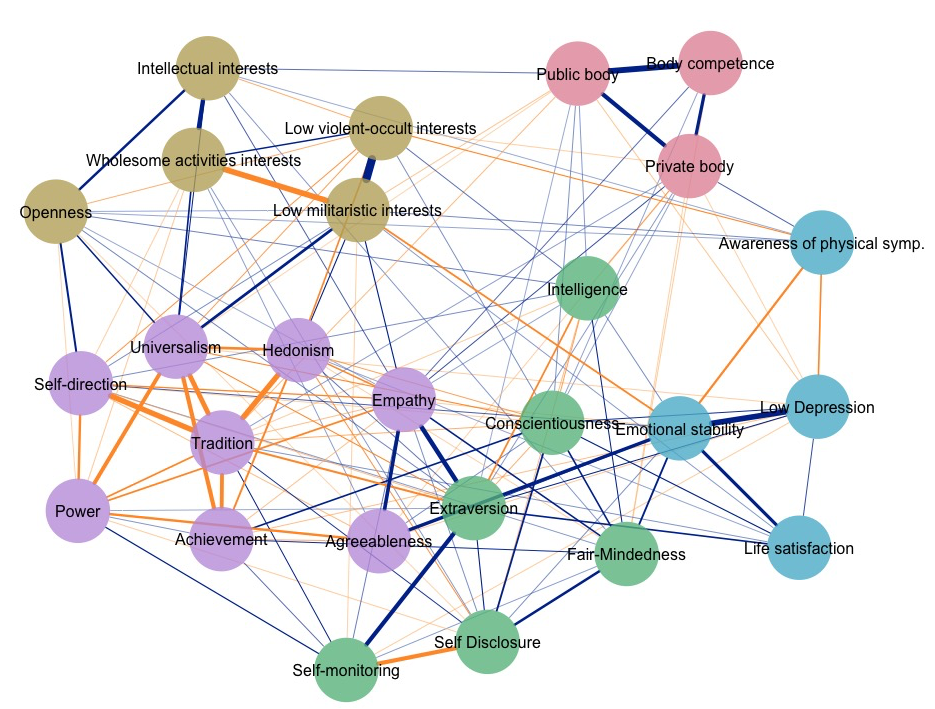
**

FIGURE 23: Five communities found with Louvian community detection algorithm

FIGURE 24: Participation Ratio (= 0.5), Participation Coefficient, and their geometric mean (standardized values) where Participation Coefficient is based on communities found by Louvian community detection algorithm

FIGURE 25: Participation Ratio (= 0.5), Participation Coefficient, and their geometric mean (unstandardized values) where Participation Coefficient is based on communities found by Louvian community detection algorithm

In this case, the nodes with highest PC values are Self-Disclosure and Intelligence, followed by Self-monitoring and Fair-Mindedness. The aforementioned is the most central node when both PR and PC are considered (with geometric mean), and was not found to be the most central according to other centrality measures and MST preformed in this study. Extraversion, Empathy, Tradition, and Emotional stability – already identified by other analyses in this study to be among the most central nodes – are in top five nodes when considering both PR and PC. This analysis additionally supports the finding reported in the main article about the important and specific role of Intelligence in this network, even though it is among the most peripheral nodes.

However, many different algorithms (for review see [8,9]) exist for community detection, and they usually yield different community structure (which will lead to different PC values). For example, see detected communities when other algorithms have been used in Figure 26. Additionally, many algorithms are stochastic, which results in different results based on random process that generates the best partition. Although community detection algorithms have been used in the network application to psychological concepts, the guidance on which algorithm to use when analysing typically small, weighted, and signed psychological networks is yet to be established.


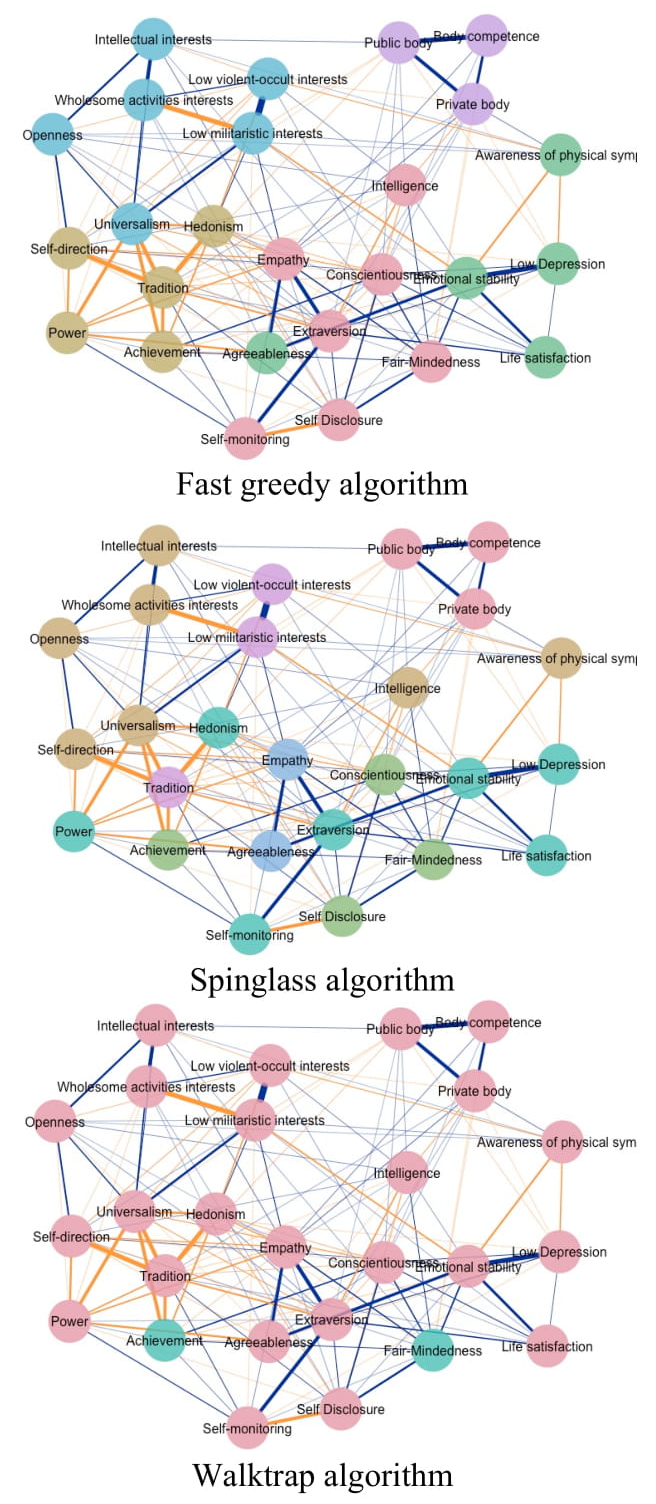


FIGURE 26: Different communities detected with three different algorithms

**References for Supplementary Material**

1. S. Epskamp and E. I. Fried, “A Tutorial on Regularized Partial Correlation Networks,” *Psychological Methods* [Internet]. 2018 Mar 29 [cited 2018 Aug]; Available from: http://arxiv.org/abs/1607.01367

2. D. R. Williams and P. Rast, “Back to the Basics: Rethinking Partial Correlation Network Methodology,” Open Science Framework [Internet]. 2018 Mar 23 [cited 2018 Apr]; Available from: https://osf.io/fndru/

3. D. R. Williams, M. Rhemtulla, A. Wysocki, and P. Rast, “On Non-Regularized Estimation of Psychological Networks,” PsyArXiv [Internet]. 2018 Apr 12 [cited 2018 Apr]; Available from: https://psyarxiv.com/xr2vf/

4. S. Epskamp, A. O. J. Cramer, L. J. Waldorp, V. D. Schmittmann, and D. Borsboom, “Qgraph: Network Visualizations of Relationships in Psychometric Data,” *Journal of Statistical Software*, vol. 48, no. 4., pp.1-18, 2012.

5. J. Schaefer, R. Opgen-Rhein, and K. Strimmer. “Package ‘GeneNet’”, R documentation [Internet].2015 [cited 2018 Oct] Available from: http://strimmerlab.org/software/genenet/

6. D. J. Robinaugh, A. J. Millner, and R. J. McNally, “Identifying highly influential nodes in the complicated grief network,” *Journal of Abnormal Psychology,* vol. 125, no. 6, pp. 747–57, 2016.

7. V. D. Blondel, J-L. Guillaume, R. Lambiotte, and E. Lefebvre. “Fast unfolding of communities in large networks,” *Journal of Statistical Mechanics,* *Theory and Experiment,* vo. 9, no.10:P10008, 2008.

8. S. Fortunato. “Community detection in graphs,” *Physics Reports,* vol. 486, no. 3–5, pp. 75–174, 2010.

9. S. Fortunato and D. Hric. “Community detection in networks: A user guide,” *Physics Reports,* vol. 659, pp. 1–44, 2016.

1. Shannon entropy (H) is a diversity index defined as , where *p* represents the fraction of positive or negative links (weights). [↑](#footnote-ref-1)
2. “Likely”, because unless, for example, three variables which are being reversed are connected only to each other or the reversed variable(s) had the same number of negative and positive ties. [↑](#footnote-ref-2)
